# Supplementary material for: Primary amine synthesis by hydrogen-involving reactions over heterogeneous cobalt catalysts
Source: Royal Society of Chemistry journal article supplement (doi:10.1039/d2cy00870j), 2022-01-01
Supplement: d2cy00870j1.pdf [file d2cy00870j1.pdf]

## Electronic Supplementary Information

### Primary Amine Synthesis by Hydrogen-involving Reactions over Heterogeneous

#### Co Catalysts

*Kahoko Kato,<sup>a</sup> Dian Deng,<sup>a</sup> Yusuke Kita,<sup>a</sup> Keigo Kamata,<sup>a</sup> Michikazu Hara<sup>\*a,b</sup>*

<sup>a</sup> Laboratory for Materials and Structures, Institute of Innovative Research, Tokyo Institute of Technology, 4259 Nagatsuta-cho, Midori-ku, Yokohama 226-8503 (Japan)

<sup>b</sup> Advanced Low Carbon Technology Research and Development Program (ALCA), Japan Science and Technology Agency (JST), 4-1-8 Honcho, Kawaguchi 332-0012 (Japan)

email: [hara.m.ae@m.titech.ac.jp](mailto:hara.m.ae@m.titech.ac.jp)

## Experimental details

### Materials

Unless noted otherwise, all chemicals were purchased from commercial sources with purity with over 95 % and used without further purification.

Basic manipulations were performed under inert gas atmosphere using glovebox (Ar) or high-vacuum techniques ( $10^{-5}$  mbar).

### Catalyst preparation

Commercially available metal oxide supports were obtained from various sources, including: MgO from Ube Material Industries and SiO<sub>2</sub> (CARiACT Q-10) from Fuji Silysia Chemicals were provided by the Catalysis Society of Japan, Nb<sub>2</sub>O<sub>5</sub> was obtained by calcination of Niobic acid (Companhia Brasileira de Metalurgia e Mineração) at 400 °C for 2 h.

All cobalt catalysts were prepared via a wet impregnation method. Typically, a certain amount of cobalt (II) nitrate hexahydrate (Co(NO<sub>3</sub>)<sub>2</sub>·6H<sub>2</sub>O, Kanto, 3N5) was dissolved in 50 mL deionized water, and approximately 1 g of support was then impregnated with the aqueous solution. After the mixture was continuously stirred at room temperature for 1 h, water was removed by rotary evaporation and the powders were then dried under vacuum (ca. 0.25 kPa, 100 °C) for 1 h to give a purple solid. The dried powder was gently ground in an agate mortar, transferred to a ceramic crucible, and then pyrolyzed under N<sub>2</sub> flow for 2 h at 400 °C with a heating rate of 3.3 °C/min.

The resultant powder was then reduced in a 30 mL/min H<sub>2</sub> flow with heating from room temperature to 600 °C at a ramp rate of ca. 3.3 °C/min and held at 600 °C for 2 h. After cooling down to room temperature in a continuous H<sub>2</sub> flow, the reduced Co/SiO<sub>2</sub> catalysts were obtained and transferred to an Ar glovebox for storage and further use.

20 wt % Pd/SiO<sub>2</sub> was prepared according to previous literature.<sup>S1</sup> Palladium(II) nitrate (Pd(NO<sub>3</sub>)<sub>2</sub>, Wako), 1 g of SiO<sub>2</sub> were added to a flask. The suspension was stirred at room temperature, evaporated to remove the water, and dried at 110 °C overnight. The dried precursor was reduced at 260 °C for 6 h with H<sub>2</sub> flow (30 mL/min) to obtain Pd/SiO<sub>2</sub>.

20 wt% Ru/SiO<sub>2</sub> was prepared according to previous report.<sup>S2</sup> Aqueous nitrosyl ruthenium(III) nitrate solution (Ru(NO)(NO<sub>3</sub>)<sub>3</sub>, Aldrich), 1 g of SiO<sub>2</sub> and water (50 mL) were added to a flask. The suspension was stirred for 1 h at room temperature, followed by evaporation and vacuum drying (50 °C, 2 h). The resulting precursor was reduced at 300 °C for 2 h with 5% H<sub>2</sub>/Ar flow (50 mL/min) to give Ru/SiO<sub>2</sub>.

20 wt% Pt/SiO<sub>2</sub> was prepared according to the previous literature.<sup>S3</sup> Hexachloroplatinum(IV) acid hexahydrate (H<sub>2</sub>PtCl<sub>6</sub>·6H<sub>2</sub>O, Wako) and SiO<sub>2</sub> were stirred

with 50 mL water for 1 h at room temperature, then evaporated to remove the water and dried at 110 °C overnight. The dried precursor powder was reduced at 500 °C for 2 h with H<sub>2</sub> flow (30 mL/min) to obtain Pt/SiO<sub>2</sub>.

### **Characterizations**

Nitrogen adsorption–desorption isotherms were measured at -196 °C by using automated gas sorption analyzer (NOVA 4200e Quantachrome). Samples were degassed at 150 °C for 1 h under vacuum prior to analysis. The Brunauer-Emmett-Teller (BET) surface area was calculated from nitrogen adsorption data in a relative pressure range from 0.05–0.3. X-ray diffraction (XRD) measurements was conducted in a Rigaku Ultima-IV system equipped with a D/teX Ultra detector using CuK $\alpha$  radiation (40 kV, 40 mA). Prior to the XRD analysis, sample was loaded on an air-sensitive sample holder (Rigaku) inside the Ar-filled glove box to prevent exposure to atmospheric conditions during the measurements. The data was collected in a 2 $\theta$  range from 20° to 90°, with a scanning step of 0.01°/s. The diffraction patterns were compared to reference patterns of the Powder Diffraction File of the International Centre for Diffraction Data (PDF-2 Release 2008)

The morphologies and sizes of the fresh and used catalysts were observed by transmission electron microscope (TEM, JEOL 2100F). Prior to TEM characterization, the samples were ultrasonically dispersed in ethanol and then dropped onto a carbon-supported copper grid. Inductively coupled plasma-atomic emission spectroscopy (ICP-AES) analyses were performed with a Shimadzu ICPS-8100 spectrometer. Thermogravimetry-Differential thermal analysis (TG-DTA) was performed with Rigaku TG-DTA8122 equipped with Rigaku smart loader auto sampler. Approximately 10 mg sample was pressed in the Platina sample holder. The thermal profiles were measured from room temperature to 600 °C.

Hydrogen temperature programmed reduction (H<sub>2</sub>-TPR) was carried out in a quartz tubular reactor with a mixture of 5% H<sub>2</sub>/Ar as the reductive gas. The calcined catalysts (0.1 g) were reduced in a flow of 30 mL/min and the temperature was raised from 60 °C to 800 °C at the ramp rate of 3.3 °C/min. The consumption of hydrogen was monitored by a TCD after passing through a 3 Å molecular sieve trap to remove the produced water. In part of the measurements the effluent gas was also analyzed by a mass spectrometer (BELMass, BEL Japan).

NMR spectra were recorded on a Bruker Avance III-400 MHz NMR spectrometer (<sup>1</sup>H-NMR 400 MHz; <sup>13</sup>C-NMR 100MHz). Data for <sup>1</sup>H NMR are reported as follows: chemical shift ( $\delta$  ppm), multiplicity (s = singlet, d = doublet, t = triplet, q = quartet, m = multiplet, br = broad), coupling constant (Hz), and integration.

### **Typical procedure for the hydrogenation of benzonitrile**

In an Ar-filled glovebox, a magnetic stirring bar, 0.5 mmol of benzonitrile, 20 mg of catalyst, and 5 mL of solvent (cyclohexane/DMF = 4) were placed into a Teflon-lined stainless steels autoclave (inner cylinder volume is 18 mL). The reactor was sealed, removed from the glovebox and then charged with the required H<sub>2</sub> pressure. The autoclave was placed into an aluminum block, heated to the desired temperature with thorough stirring (600 rpm). After completion of the reaction, the autoclave was cooled to room temperature, and excess gas was vented in a fume hood.

Yields and conversion rates were determined by quantitative gas chromatography (GC) analysis (Shimadzu GC-17A, equipped with an InertCap 17MS capillary column (internal diameter = 0.25 mm, length = 30 m) and a flame ionization detector (FID), the temperature was raised from 70 °C to 260 °C at the ramp rate of 10 °C/min and kept for 11 min.), with chlorobenzene as an internal standard.

### **Typical procedure for the reductive amination**

In an Ar-filled glovebox, a magnetic stirring bar, 0.5 mmol of aldehyde, 20 mg of catalyst, and 5 mL of solvent were placed into a Teflon-lined stainless steels autoclave (inner cylinder volume is 18 mL). The reactor was sealed, removed from the glovebox and purged with 0.1 MPa NH<sub>3</sub>, and then charged with the required H<sub>2</sub> pressure. The autoclave was placed into an aluminum block, heated to the desired temperature with thorough stirring (600 rpm). After completion of the reaction, the autoclave was cooled to room temperature, and excess gas was vented in a fume hood.

Yields and conversion rates were determined by quantitative gas chromatography (GC) analysis (Shimadzu GC-17A, equipped with an InertCap 17MS capillary column (internal diameter = 0.25 mm, length = 30 m) and a flame ionization detector (FID), the temperature was raised from 70 °C to 260 °C at the ramp rate of 10 °C/min and kept for 11 min.), with chlorobenzene as the internal standard.

### **General procedure for the hydrogenation of nitriles**

In an Ar filled glove box, a magnetic stir bar, 0.5 mmol nitrile, 20 mg of 20 wt% Co/SiO<sub>2</sub>, and 5 mL of solvent were added into a Teflon-lined stainless steels autoclave. The reactor was sealed, removed from glovebox and subsequently completed up to 1 MPa with H<sub>2</sub>. Reactions were also carried out in the glass vessel-fitted autoclaves wherever required. After completion of the reaction, the autoclave was cooled to room temperature, and excess gas was vented in fuming hood.

The combined organic fractions were concentrated in vacuo with the aid of a rotary evaporator. The crude product residue was purified by automated flash chromatography system (Smart Flash EPCLC AI-580S, Yamazen) with amino gel using a solvent mixture (ethyl acetate and methanol) as an eluent to afford the purified amine products.

### **Competitive Adsorption of 3a and 4a on metal nanoparticle**

Co or Pt nanoparticle (400 mg) was added in a 20 mL Schlenk flask. After cooling to  $-15^{\circ}\text{C}$ , primary amine **3a** (0.2 mmol), secondary imine **4a** (0.2 mmol) in toluene (2 mL) was added dropwise. The concentration of **3a** and **4a** in the reaction mixture was determined by sampling a small amount of the reaction solution after a predetermined time and measuring by GC.

### **Leaching studies**

Hot filtration was conducted to determine the effect of leached Co. 0.5 mmol **1a**, 20 mg of Co/SiO<sub>2</sub> and 5 mL of solvent (cyclohexane/DMF = 4) were added into an autoclave. The autoclave was pressurized with H<sub>2</sub> (0.5 MPa). After the reaction at 100 °C for 2 h, the reaction mixture was filtered in a glove box. The filtrate was added to an autoclave and pressurized with H<sub>2</sub> (0.5 MPa). The autoclave was heated at 100 °C for 4 h with stirring. The yield of **3a** was determined by GC analysis using chlorobenzene as an internal standard.

The catalyst was separated by suction filtration after the reaction under typical conditions. The filtrate was evaporated and dried under reduced pressure. After the addition of 5 mL of concentrated nitric acid (HNO<sub>3</sub> 1.38, Kanto), the nitric acid concentration was adjusted to 6% with H<sub>2</sub>O. The resulting solution was used for ICP-AES measurement.

The catalyst after reaction was dissolved in 5 mL of concentrated nitric acid and then the nitric acid concentration was adjusted to 6% by adding H<sub>2</sub>O. The resulting solution was used for ICP-AES measurement. The Co content of the catalyst after reaction was determined to be 20.3 wt%.

### **Reusability**

Co/SiO<sub>2</sub> can be easily separated by a remote magnetic field due to the intrinsic magnetic nature of metallic Co. An autoclave with a glass inner cylinder was used to facilitate easy removal with a magnet (inner cylinder volume is 32 mL). The reactions were set up according to the model hydrogenation of nitrile procedure with 0.5 mmol **1a** as substrate in 5 mL of solvent (cyclohexane/DMF = 4). After reaction, the autoclave was introduced into the glovebox and the glass tube put on top of a neodymium magnet for 5 min. The

supernatant was carefully removed using a glass Pasteur pipette, and the catalysts were washed three times with total 10 mL cyclohexane. Thereafter, fresh substrate and solvent were added, the tube was put back into the autoclave, subsequently purged with hydrogen. Conversion and yield were determined by GC analysis using chlorobenzene as an internal standard.

**Table S1** Comparison of the reported non-noble metal based catalytic systems for hydrogenation of nitriles with present protocols

| catalyst                                                   | Substrate      | Ammonia                              | Solvent         | $p\text{H}_2$ (MPa) | Temp. (°C) | Time (h) | Yield (%) | TON  | Ref       |
|------------------------------------------------------------|----------------|--------------------------------------|-----------------|---------------------|------------|----------|-----------|------|-----------|
| Co/SiO <sub>2</sub>                                        | benzonitrile   | none                                 | cyclohexane     | 0.5                 | 50         | 20       | 78        | 5.8  | This work |
| Co/SiO <sub>2</sub>                                        | benzonitrile   | none                                 | cyclohexane/DMF | 1                   | 100        | 6        | 89        | 6.6  | This work |
| Co <sub>2</sub> P NR/HT                                    | valeronitrile  | none                                 | 2-propanol      | 4                   | 150        | 2        | 90        | 9    | S4        |
| CoBr <sub>2</sub> + NaBHET <sub>3</sub>                    | benzonitrile   | none                                 | THF             | 2                   | 110        | 4        | 83        | 48   | S5        |
| Zr <sub>12</sub> -TPDC-Co                                  | benzonitrile   | none                                 | toluene         | 4                   | 110        | 42       | 100       | 200  | S6        |
| Co <sub>2</sub> P/HT                                       | valeronitrile  | NH <sub>3</sub> aq.<br>(31.7 equiv.) | 2-propanol      | 4                   | 150        | 1        | 99        | 5000 | S7        |
| Co(OAc) <sub>2</sub> + Zn                                  | benzonitrile   | NH <sub>3</sub> aq.<br>(1 equiv.)    | methanol        | 4                   | 120        | 15       | 94        | 19   | S8        |
| Co-B <sub>12</sub> @CeO <sub>2</sub>                       | benzonitrile   | NH <sub>3</sub> aq.<br>(10 equiv.)   | 2-propanol      | 3                   | 120        | 15       | 96        | 60   | S9        |
| Co-MOF@C-800                                               | benzonitrile   | $p\text{NH}_3$ (0.5 MPa)             | toluene         | 2.5                 | 120        | 16       | 97        | 25   | S10       |
| Co(OAc) <sub>2</sub> /Phen @Al <sub>2</sub> O <sub>3</sub> | heptanenitrile | NH <sub>3</sub> aq.<br>(8 equiv.)    | 2-propanol      | 4                   | 85         | 24       | 98        | 25   | S11       |
| Co-N-C@MgO-700                                             | benzonitrile   | NH <sub>3</sub> aq.<br>(2.5 equiv.)  | 2-propanol      | 2                   | 80         | 24       | 91        | 91   | S12       |

**Table S2** Specific surface area and crystallite diameter of the metal catalysts

| Catalyst                          | Crystallite diameter (nm) | Specific surface area (m <sup>2</sup> g <sup>-1</sup> ) | Pore size (nm) | Pore volume (mL/g) |
|-----------------------------------|---------------------------|---------------------------------------------------------|----------------|--------------------|
| Co/SiO <sub>2</sub>               | 12                        | 242                                                     | 5.6            | 1.1                |
| Co/MgO                            | 16                        | 71                                                      | 6.4            | 0.4                |
| Co/ZrO <sub>2</sub>               | 18                        | 110                                                     | 1.3            | 0.1                |
| Co/Nb <sub>2</sub> O <sub>5</sub> | 16                        | 29                                                      | -              | -                  |
| Ru/SiO <sub>2</sub>               | - <sup>a</sup>            | 226                                                     | 5.6            | 0.8                |
| Pd/SiO <sub>2</sub>               | 21                        | 281                                                     | 3.9            | 1.1                |
| Pt/SiO <sub>2</sub>               | 8                         | 219                                                     | 5.3            | 0.9                |
| Co                                | <50 <sup>b</sup>          | 16                                                      | -              | -                  |
| Pt                                | <50 <sup>b</sup>          | 11                                                      | -              | -                  |

<sup>a</sup> The value could not be determined because the peaks are too small. <sup>b</sup> Particle size determined by TEM.





**Table S4** Reductive amination of furfural using Co/SiO<sub>2</sub><sup>a</sup>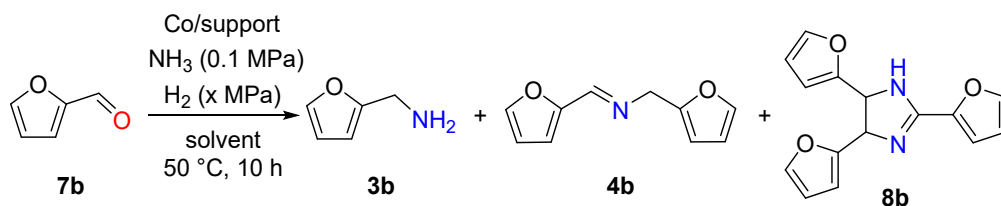

| Entry           | Support                        | Solvent     | Substrate (mmol) | Catalyst loading (mol%) | Conv. (%) | Yield (%) |           |           |
|-----------------|--------------------------------|-------------|------------------|-------------------------|-----------|-----------|-----------|-----------|
|                 |                                |             |                  |                         |           | <b>3b</b> | <b>4b</b> | <b>8b</b> |
| 1               | SiO <sub>2</sub>               | MeOH        | 0.5              | 6.8                     | >99       | 97        | 1         | 2         |
| 2               | SiO <sub>2</sub>               | EtOH        | 0.5              | 6.8                     | >99       | 85        | 11        | -         |
| 3               | SiO <sub>2</sub>               | 2-PrOH      | 0.5              | 6.8                     | >99       | 26        | 47        | -         |
| 4               | SiO <sub>2</sub>               | THF         | 0.5              | 6.8                     | >99       | 37        | 49        | -         |
| 5               | SiO <sub>2</sub>               | MeCN        | 0.5              | 6.8                     | >99       | -         | 52        | -         |
| 6               | SiO <sub>2</sub>               | Toluene     | 0.5              | 6.8                     | >99       | 53        | 37        | -         |
| 7               | SiO <sub>2</sub>               | cyclohexane | 0.5              | 6.8                     | >99       | 71        | 11        | 1         |
| 8 <sup>b</sup>  | SiO <sub>2</sub>               | Toluene     | 0.5              | 13.6                    | >99       | 97        | -         | -         |
| 9               | SiO <sub>2</sub>               | Toluene     | 1                | 3.4                     | >99       | 43        | 45        | 4         |
| 10 <sup>c</sup> | SiO <sub>2</sub>               | Toluene     | 1                | 3.4                     | >99       | 94        | -         | 6         |
| 11 <sup>d</sup> | SiO <sub>2</sub>               | Toluene     | 0.5              | 13.6                    | >99       | 74        | 19        | 1         |
| 12 <sup>d</sup> | MgO                            | Toluene     | 0.5              | 13.6                    | 60        | -         | 1         | 18        |
| 13 <sup>d</sup> | ZrO <sub>2</sub>               | Toluene     | 0.5              | 13.6                    | 80        | -         | 56        | 15        |
| 14 <sup>d</sup> | Nb <sub>2</sub> O <sub>5</sub> | Toluene     | 0.5              | 13.6                    | 88        | -         | 39        | 9         |

<sup>a</sup> Reaction conditions: Co/support (20 g), **7b** (x mmol), toluene (5 mL), NH<sub>3</sub> (0.1 MPa), *p*H<sub>2</sub> (y MPa) at 50 °C for 10 h. Yields were determined by GC analysis with chlorobenzene as an internal standard.

<sup>b</sup> Run for 24 h. <sup>c</sup> Run for 36 h using 60 mL autoclave. <sup>d</sup> Run at 90 °C for 2 h with *p*H<sub>2</sub> (4 MPa).

**Table S5** Comparison of the reported non-noble metal based catalytic systems for reductive amination of carbonyls with present protocols.
$$\text{R}-\text{C}(=\text{O}) + \text{NH}_3 + \text{H}_2 \xrightarrow{\text{Catalyst}} \text{R}-\text{CH}_2\text{NH}_2$$

| Catalyst                                                      | Substrate                       | NH <sub>3</sub><br>(equiv.) | <i>p</i> H <sub>2</sub><br>(MPa) | Temp.<br>(°C) | Time<br>(h) | Yield<br>(%) <sup>a</sup> | Ref.                    |
|---------------------------------------------------------------|---------------------------------|-----------------------------|----------------------------------|---------------|-------------|---------------------------|-------------------------|
| Co/SiO <sub>2</sub> (13.6 mol%)                               | furfural 0.5 mmol               | 0.1 (MPa)                   | 0.5                              | 50            | 10          | 97(83)                    | <b><i>This work</i></b> |
| Co-DABCO-TPA@C-800<br>(3.5 mol%)                              | furfural 0.5 mmol               | 0.5-0.7 (MPa)               | 4.0                              | 120           | 15          | 87                        | S13                     |
| Co@NC-800 (0.68 mol%)                                         | furfural 0.5 mmol               | 28                          | 1.0                              | 130           | 12          | 96.9                      | S14                     |
| Raney Co (33 mol%)                                            | furfural 0.5 mmol               | 0.1 (MPa)                   | 1.0                              | 120           | 2           | 98                        | S15                     |
| <i>in situ</i> Co-NPs (6 mol%)                                | furfural 0.5 mmol               | 0.5 (MPa)                   | 4.5                              | 120           | 24          | (89)                      | S16                     |
| Co/N-SiC (1.5 mol%)                                           | acetophenone 0.5 mmol           | 118                         | 0.1                              | 50            | 20          | 99                        | S17                     |
| Ni/Al <sub>2</sub> O <sub>3</sub> (1.2 mol%)                  | furfural 0.5 mmol               | 13.4                        | 1.0                              | 80            | 20          | 99                        | S18                     |
| Ni-TA@SiO <sub>2</sub> -800 (6<br>mol%)                       | furfural 0.5 mmol               | 0.5-0.7 (MPa)               | 2.0                              | 120           | 24          | 88                        | S19                     |
| Fe <sub>3</sub> O <sub>4</sub> @SiO <sub>2</sub> -Ni (5 mol%) | furfural 0.5 mmol               | 10                          | 2.0                              | 115           | 2           | >99 <sup>c</sup>          | S20                     |
| Ni/NiO@C-700 (7 mol%)                                         | benzaldehyde 0.5 mmol           | 20                          | 1.0                              | 90            | 4           | 99                        | S21                     |
| Fe/(N)SiC (8.6 mol%)                                          | benzaldehyde 0.5 mmol           | 93.8                        | 6.5                              | 130           | 20          | 89                        | S22                     |
| Fe-P <sub>900</sub> -PCC (0.019 mol%)                         | 1-formylbenzoic acid 47<br>mmol | 2.1                         | 6                                | 75            | 20          | 97                        | S23                     |

<sup>a</sup>The value in the parenthesis is isolated yield. <sup>b</sup>Reactions performed under MW irradiation. <sup>c</sup>Conversion (determined by GC/MS).

**Table S6** Hydrogenation of **1a** over SiO<sub>2</sub>-supported metal catalysts<sup>a</sup>

| M  | Metal loading (mol%) | Time (h)        | Conv. (%) | Yield (%) |           |           |
|----|----------------------|-----------------|-----------|-----------|-----------|-----------|
|    |                      |                 |           | <b>3a</b> | <b>4a</b> | <b>5a</b> |
| Co | 13.6                 | 5               | 54        | 2         | 43        | -         |
|    |                      | 10              | >99       | 39        | 56        | 3         |
|    |                      | 20              | >99       | 77        | 3         | 19        |
|    |                      | 25              | >99       | 79        | -         | 21        |
| Pd | 7.5                  | 10              | 82        | 12        | 60        | 2         |
|    |                      | 20              | >99       | 52        | 29        | 6         |
|    |                      | 30              | >99       | 65        | -         | 30        |
| Ru | 7.9                  | 20              | 93        | 9         | 74        | 2         |
|    |                      | 80              | >99       | 57        | -         | 40        |
|    |                      | 1               | 56        | -         | -         | 34        |
| Pt | 4.1                  | 5               | 94        | -         | -         | 63        |
|    |                      | 20              | 98        | -         | -         | 45        |
|    |                      | 20 <sup>b</sup> | 59        | -         | 9         | 23        |

<sup>a</sup> Reaction conditions: M/SiO<sub>2</sub> (20 mg), **1a** (0.5 mmol), cyclohexane (5 mL), *p*H<sub>2</sub> (0.5 MPa) at 50 °C for 20 h. Yields were determined by GC analysis with chlorobenzene as internal standard. <sup>b</sup> Run with *p*H<sub>2</sub> (0.1 MPa).

**Table S7** Hydrogenation of **4a** over Co/SiO<sub>2</sub> and Pt/SiO<sub>2</sub><sup>a</sup>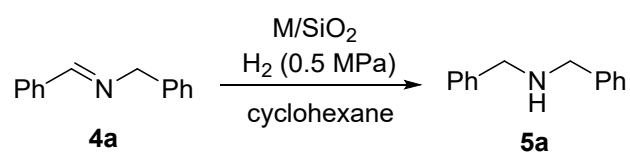

| Entry | Metal | Substrate (mmol) | Time (h) | Conv. (%) | yield (%) |
|-------|-------|------------------|----------|-----------|-----------|
| 1     | Co    | 0.25             | 2        | >99       | 78        |
| 2     | Pt    | 0.25             | 2        | >99       | 74        |
| 3     | Co    | 0.5              | 3        | >99       | >99       |
| 4     | Pt    | 0.5              | 3        | >99       | >99       |
| 5     | Co    | 5                | 2        | 19        | 8         |
| 6     | Pt    | 5                | 2        | 22        | 9         |

<sup>a</sup> Reaction conditions: **4a** (0.5 mmol), M/SiO<sub>2</sub> (0.02 g), cyclohexane (5 mL), *p*H<sub>2</sub> (0.5 MPa), 50 °C.

**Table S8** Support effects on the hydrogenation of **4a** over supported Co catalysts<sup>a</sup>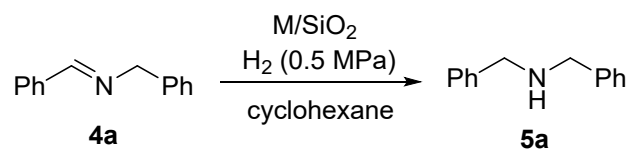

| Entry | support                        | <b>3a</b> (mmol) | $p\text{H}_2$ (MPa) | Temp. (°C) | Conv. (%) | yield (%) |
|-------|--------------------------------|------------------|---------------------|------------|-----------|-----------|
| 1     | SiO <sub>2</sub>               | 0                | 0.5                 | 50         | >99       | >99       |
| 2     |                                | 0.5              | 0.5                 | 50         | 17        | 14        |
| ----- |                                |                  |                     |            |           |           |
| 3     | MgO                            | 0                | 0.5                 | 50         | 71        | 68        |
| 4     |                                | 0.5              | 0.5                 | 50         | 38        | 29        |
| ----- |                                |                  |                     |            |           |           |
| 5     | ZrO <sub>2</sub>               | 0                | 0.5                 | 50         | 26        | 10        |
| 6     |                                | 0.5              | 0.5                 | 50         | 24        | 12        |
| 7     |                                | 0                | 2                   | 50         | 56        | 48        |
| 8     |                                | 0.5              | 2                   | 50         | 31        | 22        |
| ----- |                                |                  |                     |            |           |           |
| 9     | Nb <sub>2</sub> O <sub>5</sub> | 0                | 0.5                 | 50         | <1        | -         |
| 10    |                                | 0.5              | 0.5                 | 50         | <1        | -         |
| 11    |                                | 0                | 3                   | 100        | 19        | 2         |
| 12    |                                | 0.5              | 3                   | 100        | <1        | -         |

<sup>a</sup> Reaction conditions: **4a** (0.5 mmol), Co/support (0.02 g), cyclohexane (5 mL),  $p\text{H}_2$  (x MPa), for 2 h.

**Table S9** Additive effects of *N*-containing compounds on the hydrogenation of **4a**<sup>a</sup>

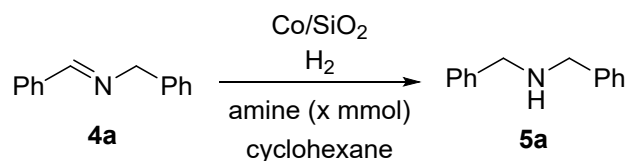

Ph-CH=N-CH2-Ph **4a**  $\xrightarrow[\text{amine (x mmol), cyclohexane}]{\text{Co/SiO}_2, \text{H}_2}$  Ph-CH2-NH-CH2-Ph **5a**

| Entry | Amine                                                                               | x (mmol) | Conv. (%) | Yield (%) |
|-------|-------------------------------------------------------------------------------------|----------|-----------|-----------|
| 1     | none                                                                                | 0        | >99       | >99       |
| 2     | <chem>Ph-CH2-NH2</chem>                                                             | 0.5      | 17        | 14        |
| 3     | <chem>Ph-CH2-NH2</chem>                                                             | 0.1      | 66        | 44        |
| 4     |   | 0.5      | 19        | 6         |
| 5     | Et <sub>3</sub> N                                                                   | 0.5      | 31        | 20        |
| 6     |  | 0.5      | 19        | 12        |
| 7     | DMF                                                                                 | 0.5      | 30        | 38        |

<sup>a</sup> Reaction conditions: **4a** (0.5 mmol), amine (x mmol), Co/SiO<sub>2</sub> (0.02 g), cyclohexane (5 mL), *p*H<sub>2</sub> (0.5 MPa), 50 °C, 2 h.

**Table S10** Time-course for the hydrogenation of **1a** over Co/SiO<sub>2</sub><sup>a</sup>

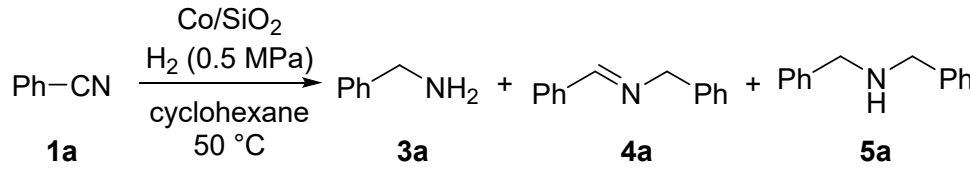

| Entry | Additive          | Time (h) | Conv. (%) | Yield (%) |           |           |
|-------|-------------------|----------|-----------|-----------|-----------|-----------|
|       |                   |          |           | <b>3a</b> | <b>4a</b> | <b>5a</b> |
| 1     |                   | 5        | 54        | 2         | 43        | 2         |
| 2     | None              | 10       | >99       | 39        | 56        | 3         |
| 3     |                   | 20       | >99       | 77        | 3         | 19        |
| 4     |                   | 25       | >99       | 79        | -         | 21        |
| 5     | DMF<br>(0.5 mmol) | 20       | >99       | 66        | 31        | 3         |
| 6     |                   | 24       | >99       | 71        | 26        | 3         |
| 7     |                   | 40       | >99       | 82        | 16        | 5         |

<sup>a</sup> Reaction conditions: **1a** (0.5 mmol), DMF (0 or 0.5 mmol), Co/SiO<sub>2</sub> (0.02 g), cyclohexane (5 mL), *p*H<sub>2</sub> (0.5 MPa), 50 °C.



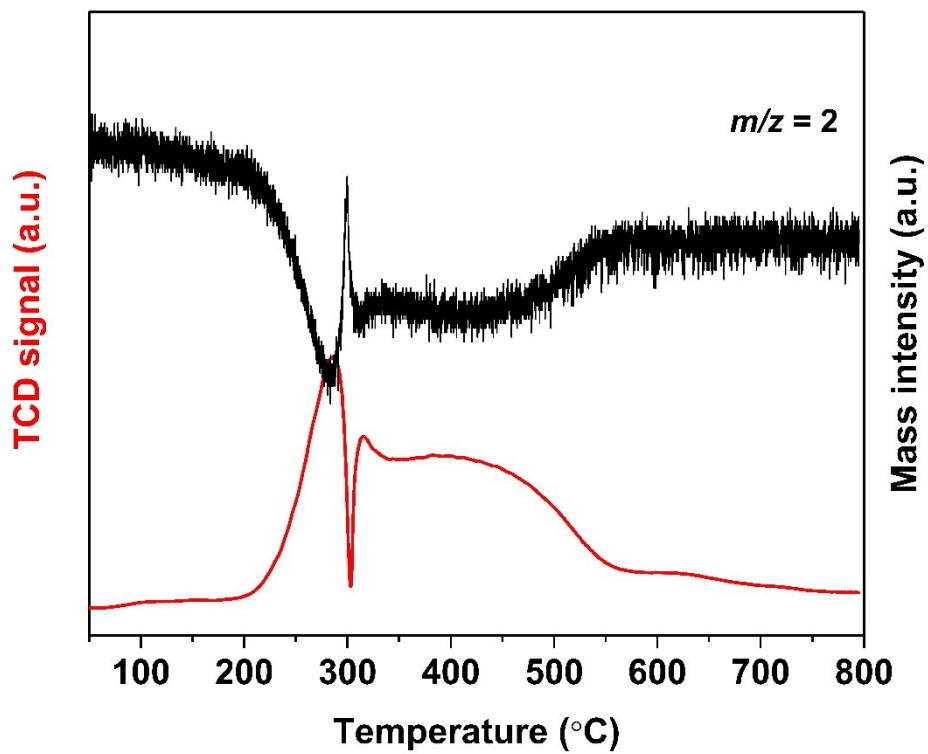

**Fig. S1** TPR profile of unreduced 20 wt% Co/SiO<sub>2</sub>

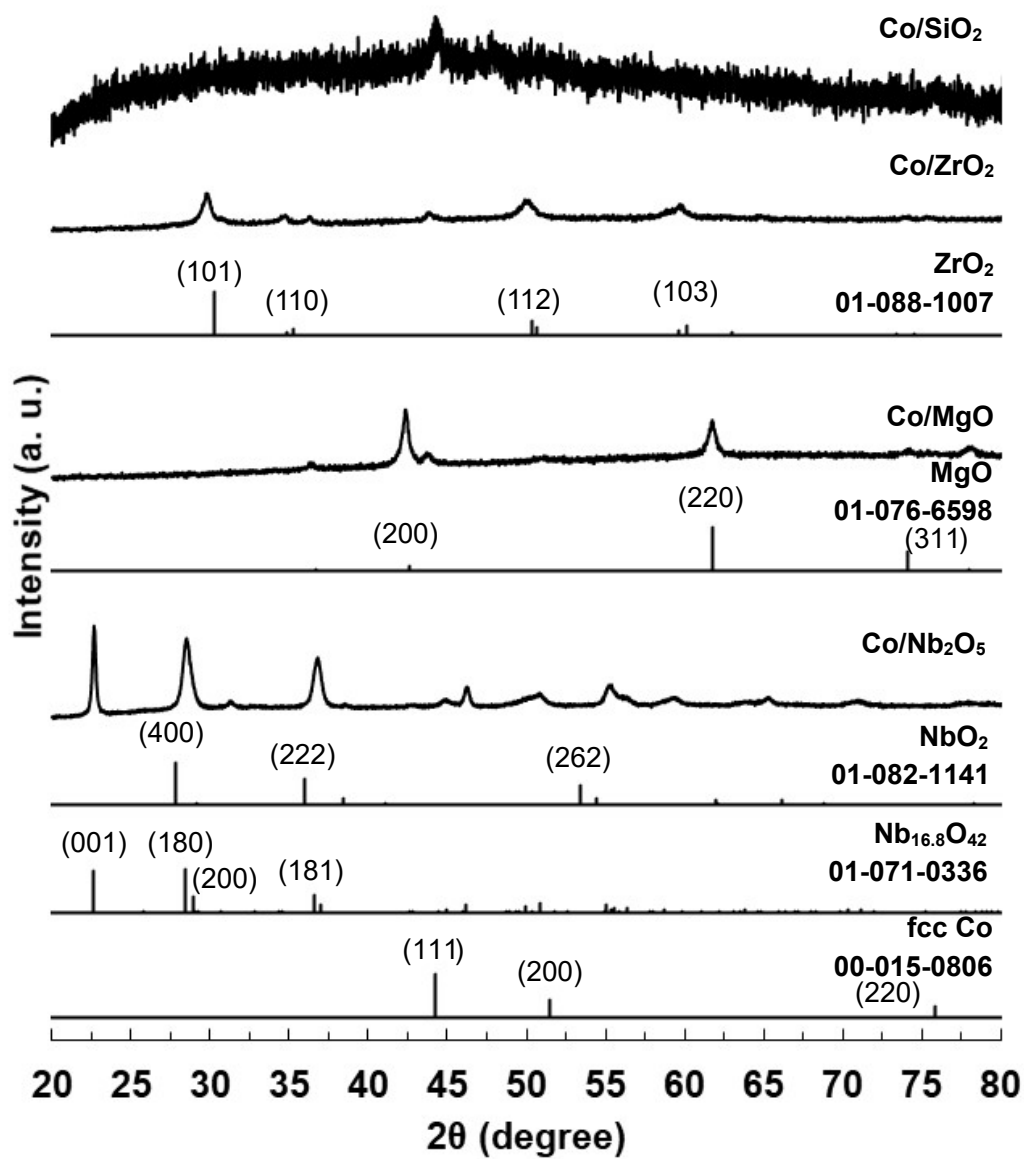

**Fig. S2** XRD patterns of various cobalt-based catalysts on various supports.

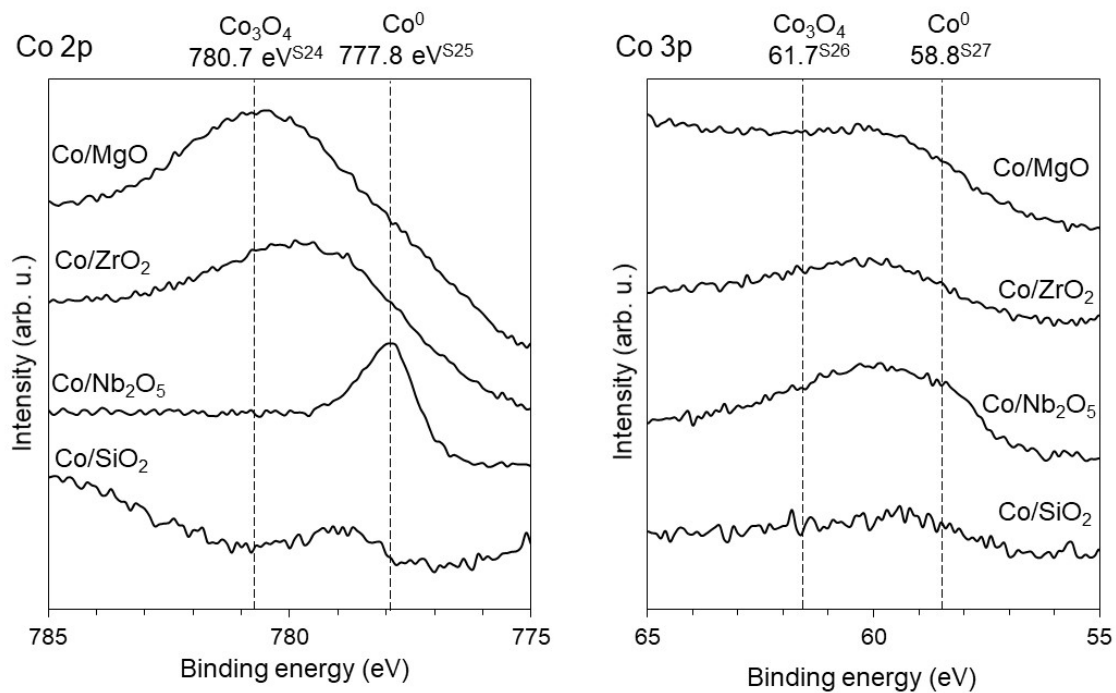

**Fig. S3** XPS spectra for supported Co catalysts.

The adsorption experiments were carried out without H<sub>2</sub> at low temperature because of the facile hydrogenation of **4a** even at low hydrogen pressure and the formation of benzonitrile through dehydrogenation of **3a**.

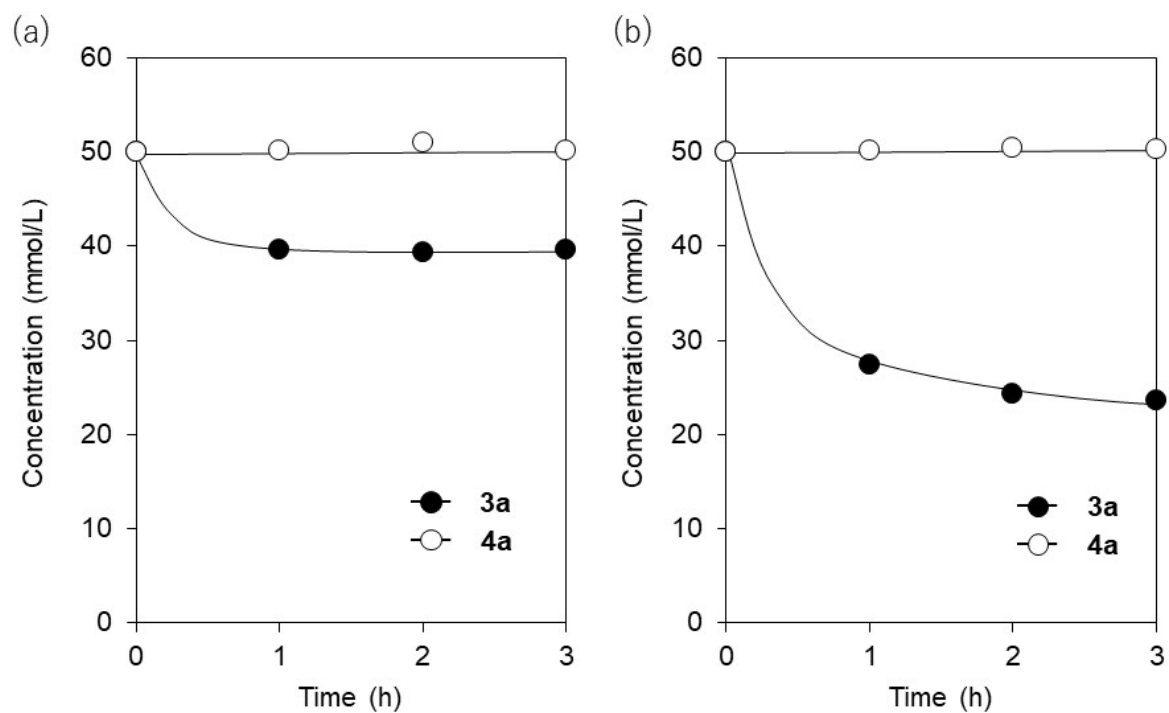

**Fig. S4** Time course of **3a** and **4a** concentration in the mixture of (a) Co, (b) Pt nanoparticles, **3a** and **4a** solution. Reaction conditions: metal nanoparticle, 0.4 g; **3a**, 0.1 mmol; **4a**, 0.1 mmol; toluene, 2 mL; -15 °C

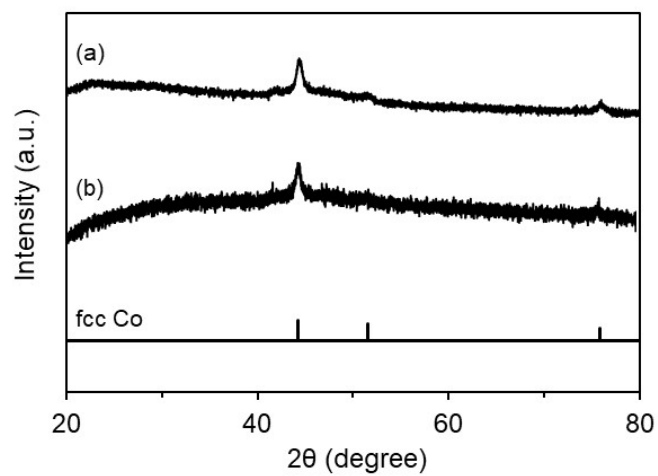

**Fig. S5** XRD patterns of (a) fresh Co/SiO<sub>2</sub>, (b) recovered Co/SiO<sub>2</sub> after hydrogenation of benzonitrile and fcc Co (JCPDS 00-015-0806).

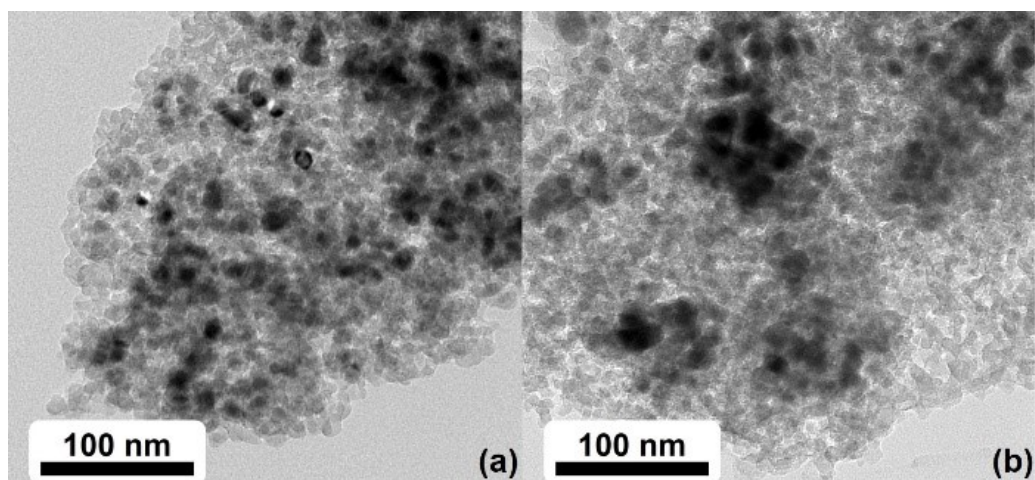

**Fig. S6** TEM images of (a) fresh Co/SiO<sub>2</sub> and (b) recovered Co/SiO<sub>2</sub> after reductive amination of furfural.

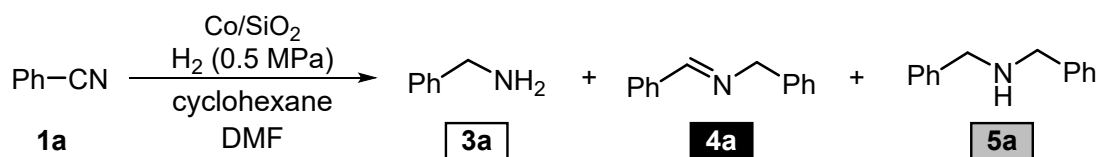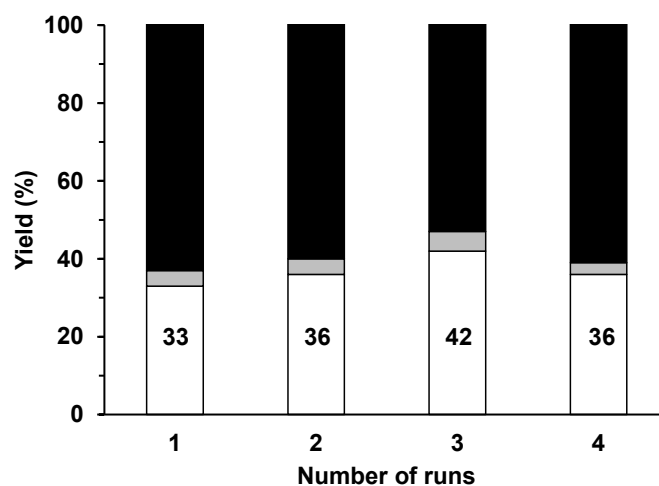

**Fig. S7** Reuse experiments with the Co/SiO<sub>2</sub> catalyst for the hydrogenation of **1a**. Reaction conditions: Co/SiO<sub>2</sub> (20 mg), **1a** (0.5 mmol), DMF (1 mL), cyclohexane (4 mL), *p*H<sub>2</sub> (0.5 MPa) at 100 °C for 2 h. Yields were determined by GC analysis with chlorobenzene as an internal standard.

Since the reuse experiments was performed in a large-capacity autoclave for ease of recovery, the yield of **3a** was lower than that obtained using a small-capacity autoclave.

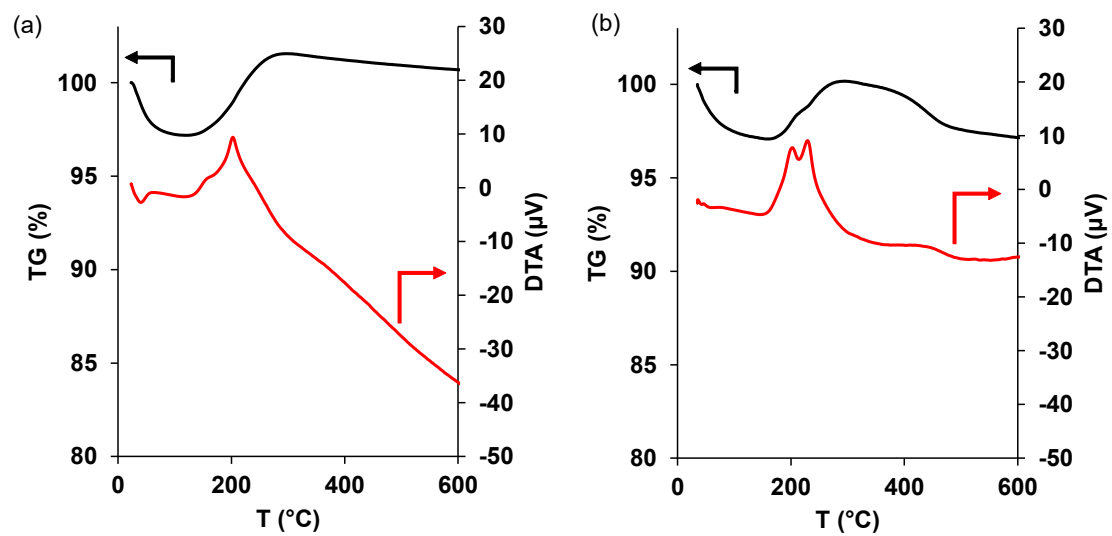

**Fig. S8** TG-DTA chart of (a) fresh Co/SiO<sub>2</sub> and (b) used Co/SiO<sub>2</sub> after hydrogenation of 1a.

## Spectral Data

### Benzylamine (**3a**)<sup>S28</sup>

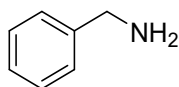

After the reaction was completed, the crude product was purified by flash column chromatography (EtOAc:MeOH = 10:0 to 6:4) to give the pure title compound (86%).

<sup>1</sup>H NMR (400 MHz, CDCl<sub>3</sub>): δ = 7.21–7.35 (m, 5H), 3.85 (s, 2H), 1.60 (br s, 2H).

<sup>13</sup>C NMR (100 MHz, CDCl<sub>3</sub>): δ = 143.3, 128.5, 127.1, 126.8, 46.5.

### Furfurylamine (**3b**)<sup>S15</sup>

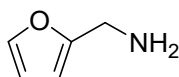

After the reaction was completed, the catalyst was separated by filtration and the obtained solution was evaporated to give the analytically pure title compound (83%).

<sup>1</sup>H NMR (400 MHz, CDCl<sub>3</sub>): δ = 7.35 (s, 1H), 6.30–6.31 (q, 1H), 6.13 (d, *J* = 3.2 Hz, 1H), 3.82 (s, 2H), 1.64 (br s, 2H).

<sup>13</sup>C NMR (100 MHz, CDCl<sub>3</sub>): δ = 156.6, 141.6, 110.2, 105.0, 39.3.

### 2-Methylbenzyl amine (**3c**)<sup>S29</sup>

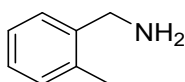

After the reaction was completed, the catalyst was separated by filtration. The crude product was purified by flash column chromatography (EtOAc:MeOH = 10:0 to 6:4) to give the mixture of the title compound with side products. The yield was calculated based on 3.84 ppm peak assigned to the benzylic position (69%).

<sup>1</sup>H NMR (400 MHz, CDCl<sub>3</sub>): δ = 7.30–7.15 (m 4H), 3.84 (s 2H), 2.33 (s 3H), 1.48 (brs 2H).

### 4-Methylbenzyl amine (**3d**)<sup>S30</sup>

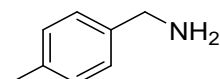

After the reaction was completed, the catalyst was separated by filtration. The crude product was purified by flash column chromatography (EtOAc:MeOH = 10:0 to 6:4) to give the mixture of the title compound with side products. The yield was calculated based on 3.81 ppm peak assigned to the benzylic position (64%).

<sup>1</sup>H NMR (400 MHz, CDCl<sub>3</sub>): δ = 7.19 (d, *J* = 8.0 Hz, 2H), 7.13 (d, *J* = 7.9 Hz, 2H), 3.81



(s, 2H), 2.33 (s, 3H), 1.52 (s, 2H).

#### 4-Methoxybenzyl amine (**3e**)<sup>S31</sup>

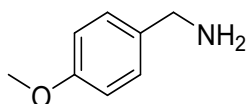

After the reaction was completed, the catalyst was separated by filtration. The crude product was purified by flash column chromatography (EtOAc:MeOH = 10:0 to 6:4) to give the pure title compound (83%).

<sup>1</sup>H NMR (400 MHz, CDCl<sub>3</sub>):  $\delta$  = 7.21 (d,  $J$  = 8.4 Hz, 2H), 6.86 (d,  $J$  = 8.4 Hz, 2H), 3.78 (s, 5H), 1.60 (br s, 2H).

<sup>13</sup>C NMR (100 MHz, CDCl<sub>3</sub>):  $\delta$  = 158.5, 135.6, 128.3, 113.9, 55.3, 45.9.

#### 4-Ethoxycarbonylbzylamine (**3f**)<sup>S32</sup>

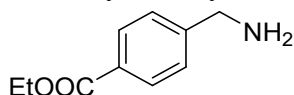

After the reaction was completed, the catalyst was separated by filtration. The crude product was purified by flash column chromatography (EtOAc:MeOH = 10:0 to 6:4) to give the mixture of the title compound with side products. The yield was calculated based on the peak at 3.87 ppm assigned to the benzylic position (53%). *N,N,N*-Tris(4-ethoxycarbonylbzyl)amine was also observed in 14% yield (3.79 ppm).

#### 4-Iodobenzyl amine hydrochloric acid (**3g**•HCl)<sup>S33</sup>

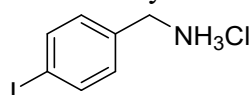

After the reaction was completed, the catalyst was separated by filtration and Hydrogen chloride ethyl ether solution was added dropwise to the resulting solution to obtain the hydrochloride salt. (79%).

<sup>1</sup>H NMR (400 MHz, CDCl<sub>3</sub>):  $\delta$  = 8.68 (s, 3H), 7.77 (d,  $J$  = 4.1 Hz, 2H), 7.34 (d,  $J$  = 4.2 Hz, 2H), 3.97 (s, 2H).

<sup>13</sup>C NMR (100 MHz, CDCl<sub>3</sub>):  $\delta$  = 137.7, 134.3, 131.8, 95.3, 42.0.

#### pyridin-3-ylmethanamine (**3h**)

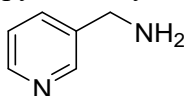

Yield was determined by GC analysis with chlorobenzene as the internal standard. The

retention time of the title compound is 13.2 minutes (62%).

octan-1-amine (**3i**)

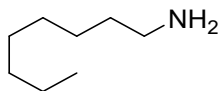

Yield was determined by GC analysis with chlorobenzene as the internal standard. The retention time of the title compound is 11.8 minutes (78%).

1,6-hexanediamine (**3j**)

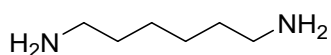

Yield was determined by GC analysis with phenanthrene as the internal standard. The retention time of the title compound is 12.6 minutes (73%).

2-Methoxybenzylamine (**3k**)<sup>S31</sup>

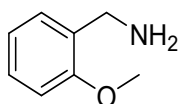

After the reaction was completed, the catalyst was separated by filtration. The crude product was purified by flash column chromatography (EtOAc:MeOH = 10:0 to 6:4) to give the pure title compound (95%).

<sup>1</sup>H NMR (400 MHz, CDCl<sub>3</sub>):  $\delta$  = 7.189–7.24 (m, 2H), 6.84–6.92 (m, 2H), 3.82 (s, 3H), 3.80 (s, 2H), 2.22 (br s, 2H).

<sup>13</sup>C NMR (100 MHz, CDCl<sub>3</sub>):  $\delta$  = 157.4, 131.5, 128.6, 128.1, 120.6, 110.3, 55.2, 42.5.

4-Fluorobenzylamine (**3l**)<sup>S31</sup>

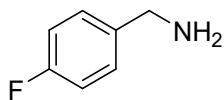

After the reaction was completed, the crude product was purified by flash column chromatography (EtOAc:MeOH = 10:0 to 6:4) to give the pure title compound (81%).

<sup>1</sup>H NMR (100 MHz, CDCl<sub>3</sub>):  $\delta$  = 7.25–7.28 (q, 2 H), 6.98–7.03 (t, 2H), 3.83 (s, 2 H), 1.76 (br s, 2 H).

<sup>13</sup>C NMR (100 MHz, CDCl<sub>3</sub>):  $\delta$  = 161.8 (d,  $J$  = 242.8 Hz), 138.8, 128.6 (d,  $J$  = 7.8 Hz), 115.2 (d,  $J$  = 21.1), 45.7.

4-Bromobenzylamine (**3m**)<sup>S18</sup>

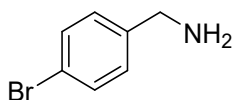

After the reaction was completed, the catalyst was separated by filtration. The crude product was purified by flash column chromatography (EtOAc:MeOH = 10:0 to 6:4) to give the pure title compound (86%).

<sup>1</sup>H NMR (400 MHz, CDCl<sub>3</sub>): δ = 7.44 (d, *J* = 8.3 Hz, 2H), 7.18 (d, *J* = 8.2 Hz, 2H), 3.82 (s, 2H), 1.59 (br s, 2H).

<sup>13</sup>C NMR (100 MHz, CDCl<sub>3</sub>): δ = 142.1, 131.5, 128.8, 120.5, 45.8.

4-(Trifluoromethyl)benzylamine (**3n**)<sup>S18</sup>

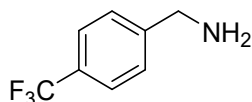

After the reaction was completed, the crude product was purified by flash column chromatography (EtOAc:MeOH = 10:0 to 6:4) to give the pure title compound (88%).

<sup>1</sup>H NMR (400 MHz, CDCl<sub>3</sub>): δ = 7.58 (d, *J* = 8.1 Hz, 2H), 7.42 (d, *J* = 8.0 Hz, 2H), 3.93 (s, 2H), 1.85 (br s, 2H).

<sup>13</sup>C NMR (100 MHz, CDCl<sub>3</sub>): δ = 146.9, 129.1 (q, *J* = 32.0 Hz), 127.3, 125.4 (q, *J* = 3.5 Hz), 124.2 (q, *J* = 270.1 Hz), 45.9.

2-Aminomethylpyrrole (**3o**)<sup>S19</sup>

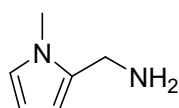

After the reaction was completed, the catalyst was separated by filtration and the obtained solution was evaporated to give the analytically pure title compound (87%).

<sup>1</sup>H NMR (400 MHz, CDCl<sub>3</sub>): δ = 6.56 (s, 1H), 6.00–6.05 (m, 2H), 3.79 (s, 2H), 3.59 (s, 3H), 2.14 (s, 2H).

<sup>13</sup>C NMR (100 MHz, CDCl<sub>3</sub>): δ = 133.7, 122.3, 106.7, 106.5, 37.8, 33.6.

4-Phenylbutan-2-amine (**3p**)<sup>S34</sup>

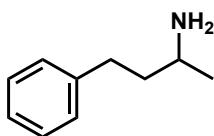

After the reaction was completed, the catalyst was separated by filtration and the obtained solution was evaporated to give the analytically pure title compound (76%).

$^1\text{H}$  NMR (400 MHz,  $\text{CDCl}_3$ ):  $\delta = 7.27\text{--}7.23$  (m, 2H), 7.18–7.14 (m, 3H), 2.94–2.89 (m, 1H), 2.69–2.59 (m, 2H), 1.69–1.63 (m, 2H), 1.11 (d,  $J = 6.4$  Hz, 3H)

$^{13}\text{C}$  NMR (100 MHz,  $\text{CDCl}_3$ ):  $\delta = 142.2, 128.4, 128.3, 125.8, 46.6, 41.2, 32.7, 23.4$

Octan-2-amine (**3q**)<sup>S35</sup>

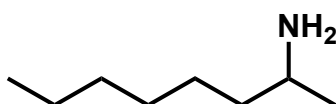

After the reaction was completed, the catalyst was separated by filtration. The obtained solution was evaporated to dryness. Yield of the title compound was determined  $^1\text{H}$  NMR analysis based on phenanthrene as an internal standard.

Dodecan-2-amine (**3r**)<sup>S36</sup>

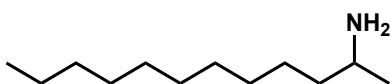

After the reaction was completed, the catalyst was separated by filtration. The obtained solution was evaporated to dryness. Yield of the title compound was determined by  $^1\text{H}$  NMR analysis based on phenanthrene as an internal standard.

Cyclohexylmethylamine (**3s**)<sup>S37</sup>

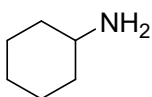

After the reaction was completed, the catalyst was separated by filtration and the obtained solution was evaporated to give the analytically pure title compound (74%).

$^1\text{H}$  NMR (400 MHz,  $\text{CDCl}_3$ ):  $\delta = 2.59\text{--}2.66$  (m, 1H), 1.57–1.86 (m, 5H), 1.00–1.32 (m, 5H).

$^{13}\text{C}$  NMR (100 MHz,  $\text{CDCl}_3$ ):  $\delta = 50.4, 36.8, 25.6, 25.1$ .

2-Adamanylamine (**3t**)<sup>S38</sup>

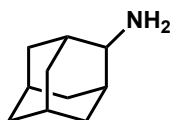

After the reaction was completed, the catalyst was separated by filtration. The obtained

solution was evaporated to dryness. Yield of the title compound was determined based on phenanthrene as an internal standard.

(5-(Aminomethyl)furan-2-yl)methanol (**3u**)<sup>S39</sup>

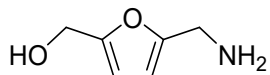

After the reaction was completed, the catalyst was separated by filtration and the obtained solution was evaporated to give the analytically pure title compound (93%).

<sup>1</sup>H NMR (400 MHz, CDCl<sub>3</sub>): δ = 6.18 (d, *J* = 3.2 Hz, 1H), 6.07 (d, *J* = 3.2 Hz, 1H), 4.53 (d, *J* = 6.8 Hz, 1H), 3.79 (s, 2H), 2.10 (br s, 3H).

<sup>13</sup>C NMR (100 MHz, CDCl<sub>3</sub>): δ = 156.3, 153.3, 108.3, 106.0, 57.3, 39.2.

17β-amino-1,3,5(10)-estratrien-3-ol (**3v**)<sup>S9</sup>

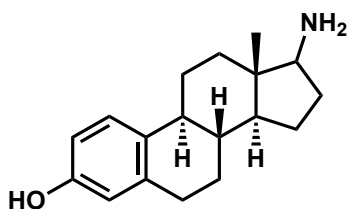

After the reaction was completed, the catalyst was separated by filtration and the obtained solution was evaporated to give the analytically pure title compound (83%).

<sup>1</sup>H NMR (400 MHz, DMSO-*d*<sub>6</sub>): δ = 8.99 (s, 2H), 7.05–7.03 (d, *J* = 8.4 Hz, 1H), 6.53–6.50 (m, 1H), 6.46–6.45 (m, 1H), 2.77–2.73 (m, 2H), 2.41–2.39 (m, 1H), 2.32–2.22 (m, 1H), 2.13–1.29 (m, 12H), 0.82 (s, 3H)

<sup>13</sup>C NMR (100 MHz, DMSO-*d*<sub>6</sub>): δ = 155.5, 137.6, 130.4, 126.5, 115.4, 113.3, 50.1, 47.8, 43.9, 38.5, 35.8, 31.9, 29.5, 26.6, 26.0, 21.6, 14.0.

## References

- (S1) M. R. Ball, K. R. Rivera-Dones, E. B. Gilcher, S. F. Ausman, C. W. Hullfish, E. A. Lebrón and J. A. Dumesic, AgPd and CuPd Catalysts for Selective Hydrogenation of Acetylene. *ACS Catal.*, 2020, **10**, 8567–8581.
- (S2) D. Deng, Y. Kita, K. Keigo and M. Hara, Low-temperature Reductive Amination of Carbonyl Compounds over Ru-deposited on Nb<sub>2</sub>O<sub>5</sub>•nH<sub>2</sub>O. *ACS Sustainable Chem. Eng.*, 2019, **7**, 4692–4698 (2019).
- (S3) T. Ano, S. Tsubaki, A. Liu, M. Matsuhisa, S. Fujii, K. Motokura, W.-J. Chun and Y. Wada, Probing the temperature of supported platinum nanoparticles under microwave irradiation by in situ and operando XAFS. *Commun. Chem.*, 2020, **3**, 86.
- (S4) M. Sheng, S. Yamaguchi, A. Nakata, S. Yamazoe, K. Nakajima, J. Yamasaki, T. Mizugaki and T. Mitsudome, Hydrotalcite-Supported Cobalt Phosphide Nanorods as a Highly Active and Reusable Heterogeneous Catalyst for Ammonia-Free Selective Hydrogenation of Nitriles to Primary Amines, *ACS Sustainable Chem. Eng.*, 2021, **9**, 11238–11246.
- (S5) H. Dai and H. Guan, Switching the selectivity of Cobalt-catalyzed Hydrogenation of Nitriles. *ACS Catal.*, 2018, **8**, 9125–9130.
- (S6) P. Ji, K. Manna, Z. Lin, X. Feng, A. Urban, Y. Song and W. Lin, Single-site Cobalt Catalysts at New Zr<sub>12</sub>(μ<sub>3</sub>-O)<sub>8</sub>(μ<sub>3</sub>-OH)<sub>8</sub>(μ<sub>2</sub>-OH)<sub>6</sub> Metal-organic Framework Nodes for Highly Active Hydrogenation of Nitroarenes, Nitriles, and Isocyanides. *J. Am. Chem. Soc.*, 2017, **139**, 7004-7011.
- (S7) T. Mitsudome, M. Sheng, A. Nakata, J. Yamasaki, T. Mizugaki and K. Jitsukawa, A Cobalt Phosphide Catalyst for the Hydrogenation of Nitriles. *Chem. Sci.*, 2020, **11**, 6682–6689.
- (S8) D. Timelthaler and C. Topf, Liquid-phase Hydrogenation of Nitriles to Amines Facilitated by a Co(II)/Zn(0) Pair: A Ligand-free Catalytic Protocol. *J. Org. Chem.*, 2019, **84**, 11604–11611.
- (S9) R. Ferraccioli, D. Borovika, A.-E. Surkus, C. Kreyenschulte, C. Topf and M. Beller, Synthesis of Cobalt Nanoparticles by pyrolysis of vitamin B12: a non-noble-metal catalyst for efficient hydrogenation of nitriles. *Catal. Sci. Technol.*, 2018, **8**, 499–507.
- (S10) K. Murugesan, T. Senthamarai, M. Sohail, A. S. Alshammari, M.-M. Pohl and M. Beller, Cobalt-based Nanoparticles Prepared from MOF-Carbon Templates as efficient Hydrogenation Catalysts. *Chem. Sci.*, 2018, **9**, 8553–8560.
- (S11) F. Chen, C. Topf, J. Radnik, C. Kreyenschulte, H. Lund, M. Schneider, A.-E. Surkus, L. He, K. Junge and M. Beller, Stable and Cobalt Catalysts for Highly Selective and Practical Hydrogenation of C≡N and C=O Bonds. *J. Am. Chem. Soc.*,

- 2016, **138**, 8781–8788.
- (S12) D. Formenti, R. Mocci, H. Atia, S. Dastgir, M. Anwar, S. Bachmann, M. Scalone, K. Junge and M. Beller, A state-of-the-art heterogeneous catalyst for efficient and general nitrile hydrogenation. *Chem. Eur. J.*, 2020, **26**, 15589–15595.
- (S13) R. V. Jagadeesh, K. Murugesan, A. S. Alshammari, H. Neumann, M.-M. Pohl, J. Radnik and M. Beller, MOF-derived Cobalt Nanoparticles Catalyze a General Synthesis of Amines. *Science*, 2017, **358**, 326–332.
- (S14) Z. Yuan, B. Liu, P. Zhou, Z. Zhang and Q. Chi, Preparation of Nitrogen-doped Carbon Supported Cobalt Catalysts and Its Application in the Reductive Amination. *J. Catal.*, 2019, **370**, 347–356.
- (S15) K. Zhou, B. Chen, X. Zhou, S. Kang, Y. Xu and J. Wei, Selective Synthesis of Furfurylamine by Reductive Amination of Furfural over Raney Cobalt. *ChemCatChem*, 2019, **11**, 5562–5569.
- (S16) T. Senthamarai, V. G. Chandrashekhar, M. B. Gawande, N. V. Kalevaru, R. Zbořil, P. C. J. Kamer, R. V. Jagadeesh and M. Beller, Ultra-small cobalt nanoparticles from molecularly-defined Co–salen complexes for catalytic synthesis of amines. *Chem. Sci.*, 2020, **11**, 2973–2981.
- (S17) M. Elfinger, T. Schönauer, S. L. J. Thomä, R. Stäglich, M. Drechsler, M. Zobel, J. Senker and R. Kempe, Co-catalyzed synthesis of primary amines via reductive amination employing hydrogen under very mild conditions, *ChemSusChem*, 2021, **14**, 2360–2366.
- (S18) G. Hahn, P. Kunas, N. de Jonge and R. Kempe, General synthesis of primary amines via reductive amination employing a reusable nickel catalyst. *Nat. Catal.*, 2019, **2**, 71–77.
- (S19) K. Murugesan, M. Beller and R. V. Jagadeesh, Reusable Nickel Nanoparticles-catalyzed Reductive Amination for Selective Synthesis of Primary Amines. *Angew. Chem. Int. Ed.*, 2019, **58**, 5064–5068.
- (S20) M. Manzoli, E. C. Gaudino, G. Cravotto, S. Tabasso, R. B. N. Baig, E. Colacino and R. S. Varma, Microwave-Assisted Reductive Amination with Aqueous Ammonia: Sustainable Pathway Using Recyclable Magnetic Nickel-Based Nanocatalyst. *ACS Sustainable Chem. Eng.*, 2019, **7**, 5963–5974.
- (S21) J. Liu, Y. Zhu, C. Wang, T. Singh, N. Wang, Q. Liu, Z. Cui and L. Ma, Facile synthesis of controllable graphene-co-shelled reusable Ni/NiO nanoparticles and their application in the synthesis of amines under mild conditions. *Green Chem.*, 2020, **22**, 7387–7397.
- (S22) C. Bäuml, C. Bauer and R. Kempe, The synthesis of primary amines through

- reductive amination employing an iron catalyst. *ChemSusChem*, 2020, **13**, 3110–3114.
- (S23) X. Long, Z. Li, G. Gao, P. Sun, J. Wang, B. Zhang, J. Zhong, Z. Jiang and F. Li, Graphitic phosphorus coordinated single Fe atoms for hydrogenative transformations. *Nat. Commun.*, 2020, **11**, 4074.
- (S24) B. J. Tan, K. J. Klabunde and P. M. A. Sherwood, XPS Studies of Solvated Metal Atom Dispersed (SMAD) Catalysts. Evidence for Layered Cobalt –Manganese Particles on Alumina and Silica. *J. Am. Chem. Soc.*, 1991, **113**, 855–861.
- (S25) J. P. Bonnelle, J. Grimblot and A. D’Huysser, Influence de la Polarisation des Liaisons sur les Spectres esca des Oxydes de Cobalt. *J. Electron Spectros. Relat. Phenomena*, 1975, **7**, 151–162.
- (S26) C. A. Strydom and H. J. Strydom, X-ray Photoelectron Spectroscopy Studies of Some Cobalt(II) Nitrate Complexes. *Inorg. Chim. Acta*, 1989, **159**, 191–195.
- (S27) A. Sarnecki, P. Adamski, A. Albrecht, A. Komorowska, M. Nadziejko and D. Moszynski, XPS Study of Cobalt-Ceria Catalysts for Ammonia Synthesis – The Reduction Process. *Vacuum*, 2018, **155**, 434–438.
- (S28) A. M. Ayedi, L. Y. Bigot, H. Ammar, S. Abid, E. R. Gharbi and M. Delmas, Synthesis of Primary Amines by One-Pot Reductive Amination of Aldehydes. *Synth. Commun.*, 2013, **43**, 2127–2133.
- (S29) Y. Liu, S. He, Z. Quan, H. Cai, Y. Zhao and B. Wang, Mild Palladium-catalysed Highly Efficient Hydrogenation of  $C \equiv N$ ,  $C-NO_2$ , and  $C=O$  Bonds Using  $H_2$  of 1 atm in  $H_2O$ . *Green Chem.*, 2019, **21**, 830–838.
- (S30) L. Liu, J. Li, Y. Ai, Y. Liu, J. Xiong, H. Wang, Y. Qiao, W. Liu, S. Tan, S. Feng, K. Wang, H. Sun and Q. Liang, A ppm level Rh-based composite as an ecofriendly catalyst for transfer hydrogenation of nitriles: triple guarantee of selectivity for primary amines. *Green Chem.*, 2019, **21**, 1390–1395.
- (S31) M. Elfinger, T. Schönauer, S. L. J. Thomä, R. Stäglich, M. Drechsler, M. Zobel, J. Senker and R. Kempe, Co-catalyzed synthesis of primary amines via reductive amination employing hydrogen under very mild conditions, *ChemSusChem*, 2021, **14**, 2360–2366.
- (S32) J. M. Gawel, A. E. Shouksmith, Y. S. Raouf, N. Nawar, K. Toutah, S. Bukhari, P. Manaswiyoungkul, O. O. Olaoye, J. Israelian, T. B. Radu, A. D. Cabral, D. Sina, A. Sedighi, E. D. de Araujo and P. T. Gunning, PTG-0861: A novel HDAC6-selective inhibitor as a therapeutic strategy in acute myeloid leukaemia. *Eur. J. Med. Chem.*, 2020, **201**, 112411.
- (S33) N. Gandhamsetty, J. Jeong, J. Park, S. Park and S. Chang, Boron-Catalyzed



- Silylative Reduction of Nitriles in Accessing Primary Amines and Imines. *J. Org. Chem.*, 2015, **80**, 7281–7287.
- (S34) K. Tanaka, T. Miki, K. Murata, A. Yamaguchi, Y. Kayaki, S. Kuwata, T. Ikariya and M. Watanabe, Reductive Amination of Ketonic Compounds Catalyzed by Cp\*Ir(III) Complexes Bearing a Picolinamidato Ligand. *J. Org. Chem.*, 2019, **84**, 10962–10977.
- (S35) M. Kitamura, D. Lee, S. Hayashi, S. Tanaka and M. Yoshimura, Catalytic Leuckart-Wallach-type Reductive Amination of Ketones, *J. Org. Chem.*, 2002, **67**, 8685–8687.
- (S36) R. G. Laughlin, Reversible Cycloelimination and Disproportionation Reactions in Aliphatic Amine Oxide-*N,N*-Dimethylhydroxylamine-Olefin Systems. *J. Am. Chem. Soc.*, 1973, **95**, 3295–3299.
- (S37) N. Chatterjee, M. Arfeen, P. V. Bharatam and A. Goswami, A Metal and Base-Free Chemoselective Primary Amination of Boronic Acids Using Cyanamidyl/Arylcyanamidyl Radical as Aminating Species: Synthesis and Mechanistic Studies by Density Functional Theory. *J. Org. Chem.*, 2016, **81**, 5120–5127.
- (S38) S. Imm, S. Bähn, L. Neubert, H. Neumann and M. Beller, An Efficient and General Synthesis of Primary Amines by Ruthenium-Catalyzed Amination of Secondary Alcohols with Ammonia, *Angew. Chem. Int. Ed.*, 2010, **49**, 8126–8129.
- (S39) S. M. Holfinger, H. A. Conner, R. D. Holm and G. C. Hill, Jr. Synthesis of Difurfuryl Diamines by the Acidic Condensation of Furfurylamine with Aldehydes and Their Mechanism of Formation. *J. Org. Chem.*, 1995, **60**, 1595–1598.

NMR spectra

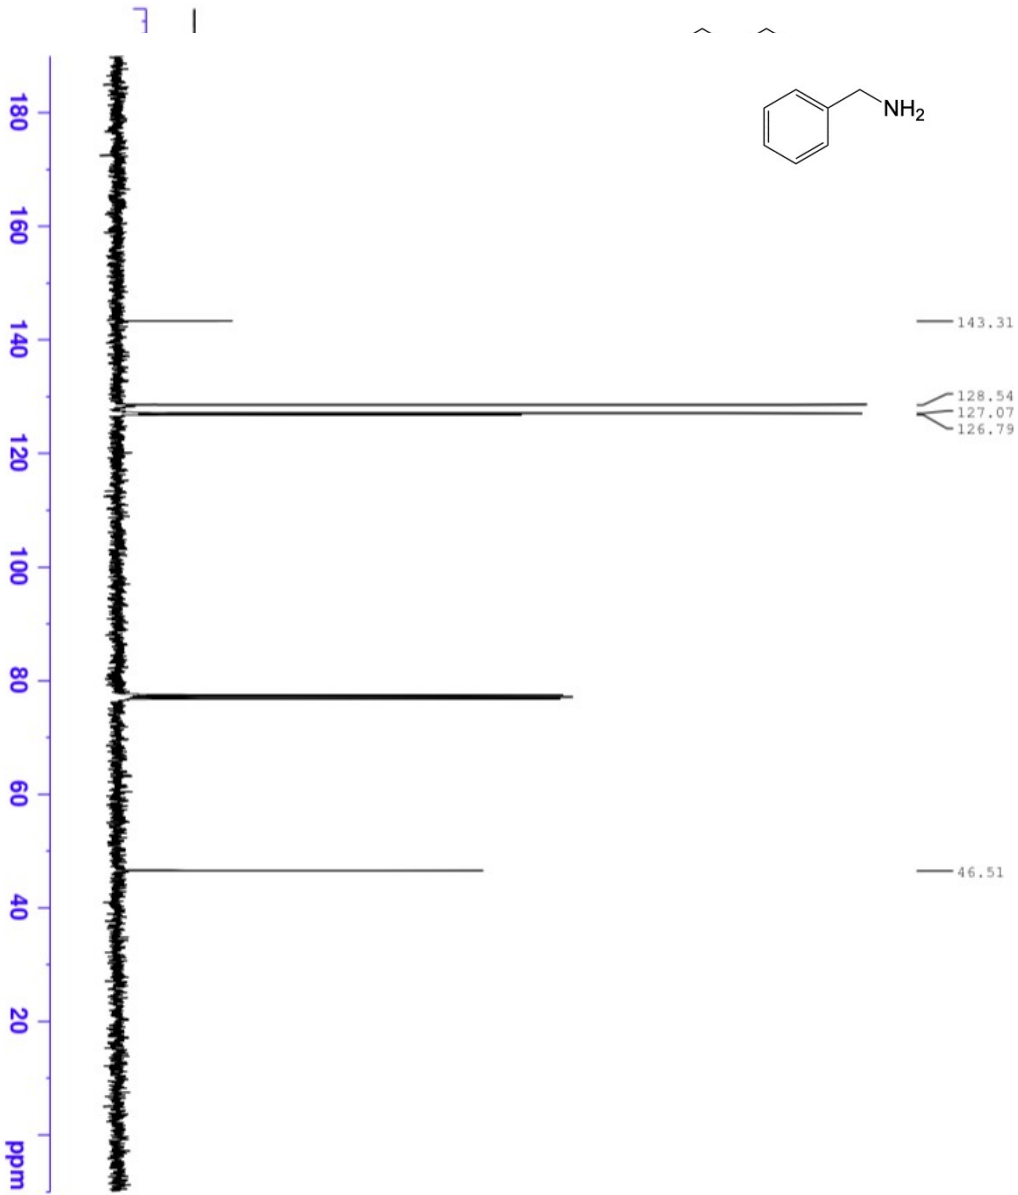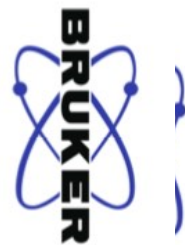

Current Data Parameters  
 NAME No.2-BA-13C  
 EXPNO 1  
 PROCNO 1

F2 - Acquisition Parameters  
 Date\_ 20191009  
 Time 17.02

INSTRUM spect  
 PROBHD 5 mm PABBO BB-  
 PULPROG zgpg30  
 TD 65536  
 SOLVENT CDCl3  
 NS 52

DS 4  
 SMH 24038.461 Hz  
 FIDRES 0.366798 Hz  
 AQ 1.3631488 sec  
 RG 203  
 DW 20.800 usec  
 DE 6.50 usec  
 TE 299.9 K  
 D1 2.00000000 sec  
 D11 0.03000000 sec  
 TD0 1

==== CHANNEL f1 =====  
 SFO1 100.6228298 MHz  
 NUC1 13C  
 P1 10.00 usec  
 PLW1 53.46578979 W

==== CHANNEL f2 =====  
 SFO2 400.1316005 MHz  
 NUC2 1H  
 CPDPRG2 waltz16  
 PCPD2 80.00 usec  
 PLW2 11.70547009 W  
 PLW12 0.37015951 W  
 PLW13 0.37015951 W

F2 - Processing parameters  
 SI 32768  
 SF 100.6127690 MHz  
 WDW EM  
 SSB 0  
 LB 3.00 Hz  
 GB 0  
 PC 1.40

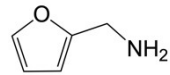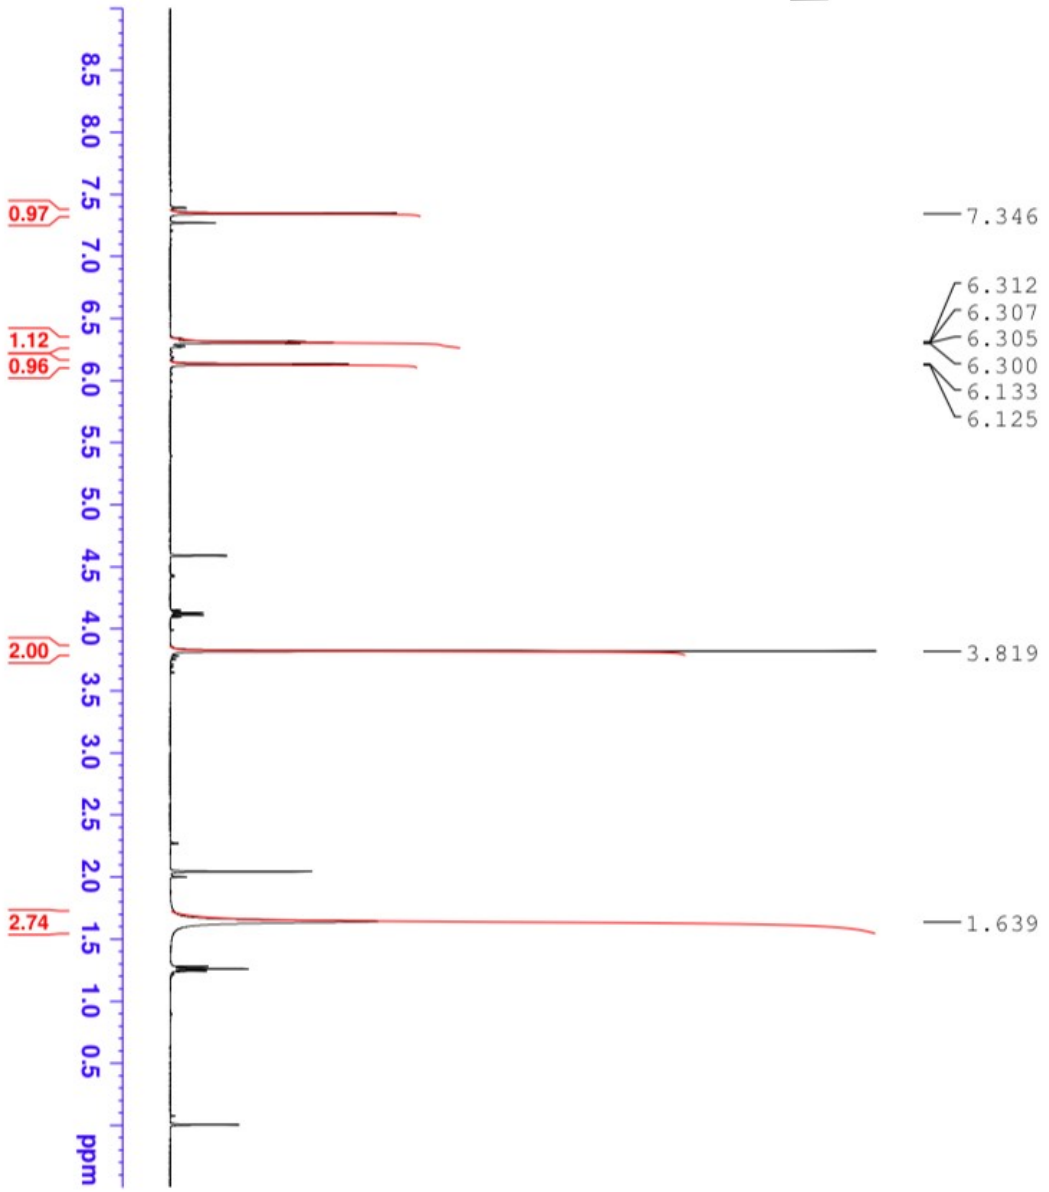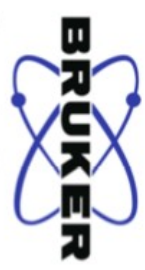

Current Data Parameters  
 NAME No.2-16-1H  
 EXPNO 1  
 PROCNO 1

F2 - Acquisition Parameters  
 Date\_ 20191101  
 Time 13.58  
 INSTRUM spect  
 PROBHD 5 mm PABBO BB-  
 PULPROG zg30  
 TD 65336  
 SOLVENT CDCl3  
 NS 8  
 DS 2

SWH 8012.820 Hz  
 FIDRES 0.122266 Hz  
 AQ 4.089465 sec  
 RG 128  
 DW 62.400 usec  
 DE 6.50 usec  
 TE 298.8 K  
 DI 1.00000000 sec  
 TD0 1

==== CHANNEL f1 =====  
 SF01 400.1324710 MHz  
 NUC1 1H  
 P1 15.00 usec  
 PLW1 11.89999962 W

F2 - Processing parameters  
 SI 65536  
 SF 400.1300063 MHz  
 NDM EM  
 SSB 0  
 LB 0.30 Hz  
 GB 0  
 PC 1.00

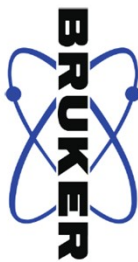

Current Data Parameters  
NAME o-tolunitrile  
EXPNO 10  
PROCNO 1

F2 - Acquisition Parameters  
Date\_ 20211119  
Time 8:55 h

INSTRUM spect  
PROBHD Z108618\_0155 ( 2930  
PULPROG 65536  
TD CDC13  
SOLVENT CDCl3  
NS 16  
DS 2

SMH 8012.820 Hz  
FIDRES 0.244532 Hz  
AQ 4.0894465 sec  
RG 161  
DW 62.400 usec  
DE 16.92 usec  
TE 296.3 K

DI 1.00000000 sec  
TDO 1  
SFO1 400.1324708 MHz  
NUC1 1H  
P0 5.00 usec  
P1 15.00 usec  
PLM1 11.30000019 W

F2 - Processing parameters  
SI 65536  
SF 400.1300165 MHz  
WDW EM  
SSB 0  
LB 0.30 Hz  
GB 0  
PC 1.00

7.900  
7.898  
7.881  
7.879  
7.739  
7.735  
7.675  
7.672  
7.655  
7.638  
7.634  
7.615  
7.612  
7.595  
7.578  
7.576  
7.244  
7.202  
7.182  
7.148  
7.128

3.815

2.333

1.516

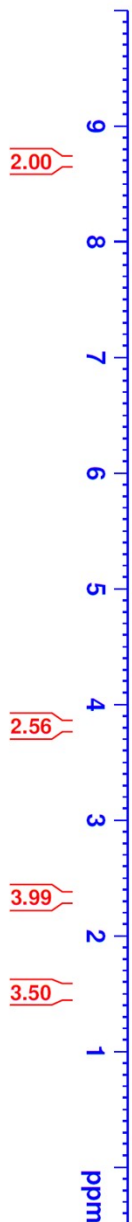

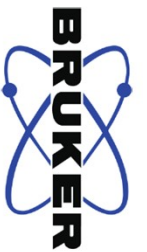

- 7.874
- 7.735
- 7.671
- 7.668
- 7.654
- 7.650
- 7.633
- 7.630
- 7.611
- 7.608
- 7.592
- 7.574
- 7.572
- 7.301
- 7.284
- 7.241
- 7.190
- 7.185
- 7.181
- 7.172
- 7.162
- 7.158
- 7.148
- 7.146
- 3.844
- 2.918
- 2.862
- 2.327
- 2.035
- 1.476
- 1.267
- 1.249
- 1.231

Current Data Parameters  
NAME p-column11e  
EXPNO 10  
PROCNO 1

F2 - Acquisition Parameters

Date\_ 2021118  
Time 19.34 h  
INSTRUM spect  
PROBHD Z108618\_0155 ( 2330  
PULPROG zg30  
TD 65536  
SOLVENT CDCl3  
NS 16  
DS 2  
SWH 8012.820 Hz  
FIDRES 0.244532 Hz  
AQ 4.0894465 sec  
RG 101  
DW 62.400 usec  
DE 16.92 usec  
TE 296.1 K  
D1 1.00000000 sec  
TD0 1  
SF01 400.1324708 MHz  
NUC1 1H  
P0 5.00 usec  
P1 15.00 usec  
PLM1 11.30000019 W

F2 - Processing parameters

SI 65536  
SF 400.1300173 MHz  
WDW EM  
SSB 0  
LB 0.30 Hz  
GB 0  
PC 1.00

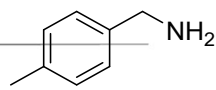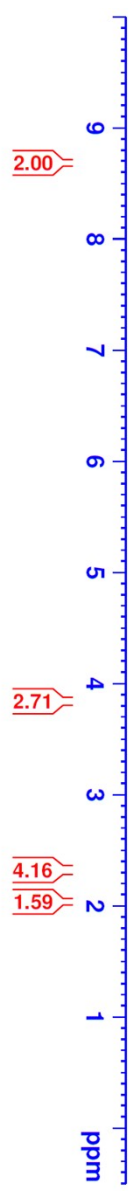

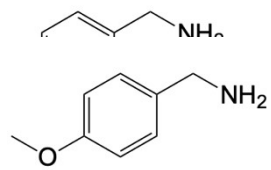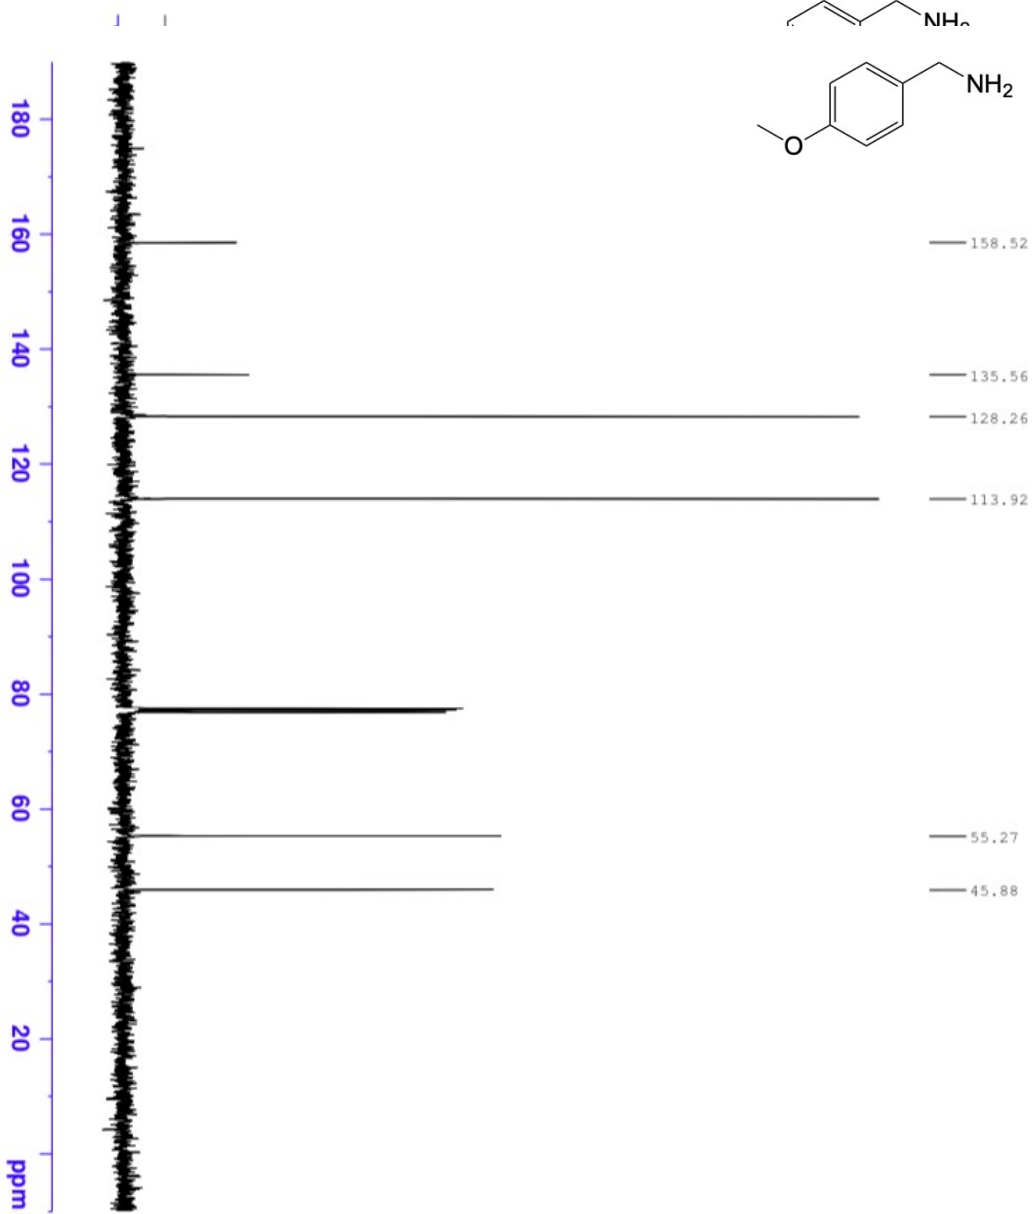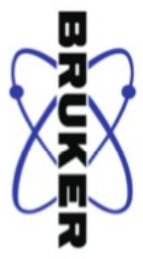

Current Data Parameters  
 NAME No.2-P-AA-13C  
 EXPNO 1  
 PROCNO 1

F2 - Acquisition Parameters  
 Date\_ 20191025  
 Time 16.44  
 INSTRUM spect  
 PROBHD 5 mm PABBO BB-  
 PULPROG zgpg30  
 TD 65536  
 SOLVENT CDCl3  
 NS 12  
 DS 4  
 SWH 24038.461 Hz  
 FIDRES 0.366798 Hz  
 AQ 1.3631488 sec  
 RG 90.5  
 DM 20.800 usec  
 DE 6.50 usec  
 TE 298.8 K  
 D1 2.00000000 sec  
 D11 0.03000000 sec  
 TD0 1

==== CHANNEL f1 =====  
 SF01 100.6228298 MHz  
 NUCL1 13C  
 P1 10.00 usec  
 PLW1 53.46578979 W

==== CHANNEL f2 =====  
 SF02 400.1316005 MHz  
 NUCL2 1H  
 CPDPRG2 waltz16  
 PCPD2 80.00 usec  
 PLW2 11.70547009 W  
 PLW12 0.37015951 W  
 PLW13 0.37015951 W

F2 - Processing parameters  
 SI 32768  
 SE 100.6127690 MHz  
 WDW EM  
 SSB 0  
 LB 3.00 Hz  
 GB 0  
 PC 1.40

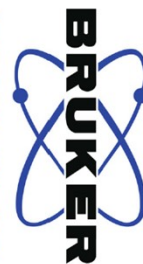

Current Data Parameters  
NAME Ethyl 4-cyanobenzoate  
EXPNO 10  
PROCNO 1

F2 - Acquisition Parameters  
Date\_ 20220311  
Time 11.56 h  
INSTRUM spect  
PROBHD Z108618\_0155 (2930  
PULPROG 65336  
TD CDC13  
SOLVENT  
NS 16  
DS 2  
SWH 8012.820 Hz  
FIDRES 0.244532 Hz  
AQ 4.0894465 sec  
RG 32  
DW 62.400 usec  
DE 16.92 usec  
TE 297.5 K  
D1 1.00000000 sec  
TD0 1  
SFO1 400.1324708 MHz  
NUC1 1H  
P0 5.00 usec  
P1 15.00 usec  
PLW1 11.30000019 W

F2 - Processing parameters  
SI 65536  
SF 400.1300224 MHz  
WDW EM  
SSB 0  
LB 0.30 Hz  
GB 0  
PC 1.00

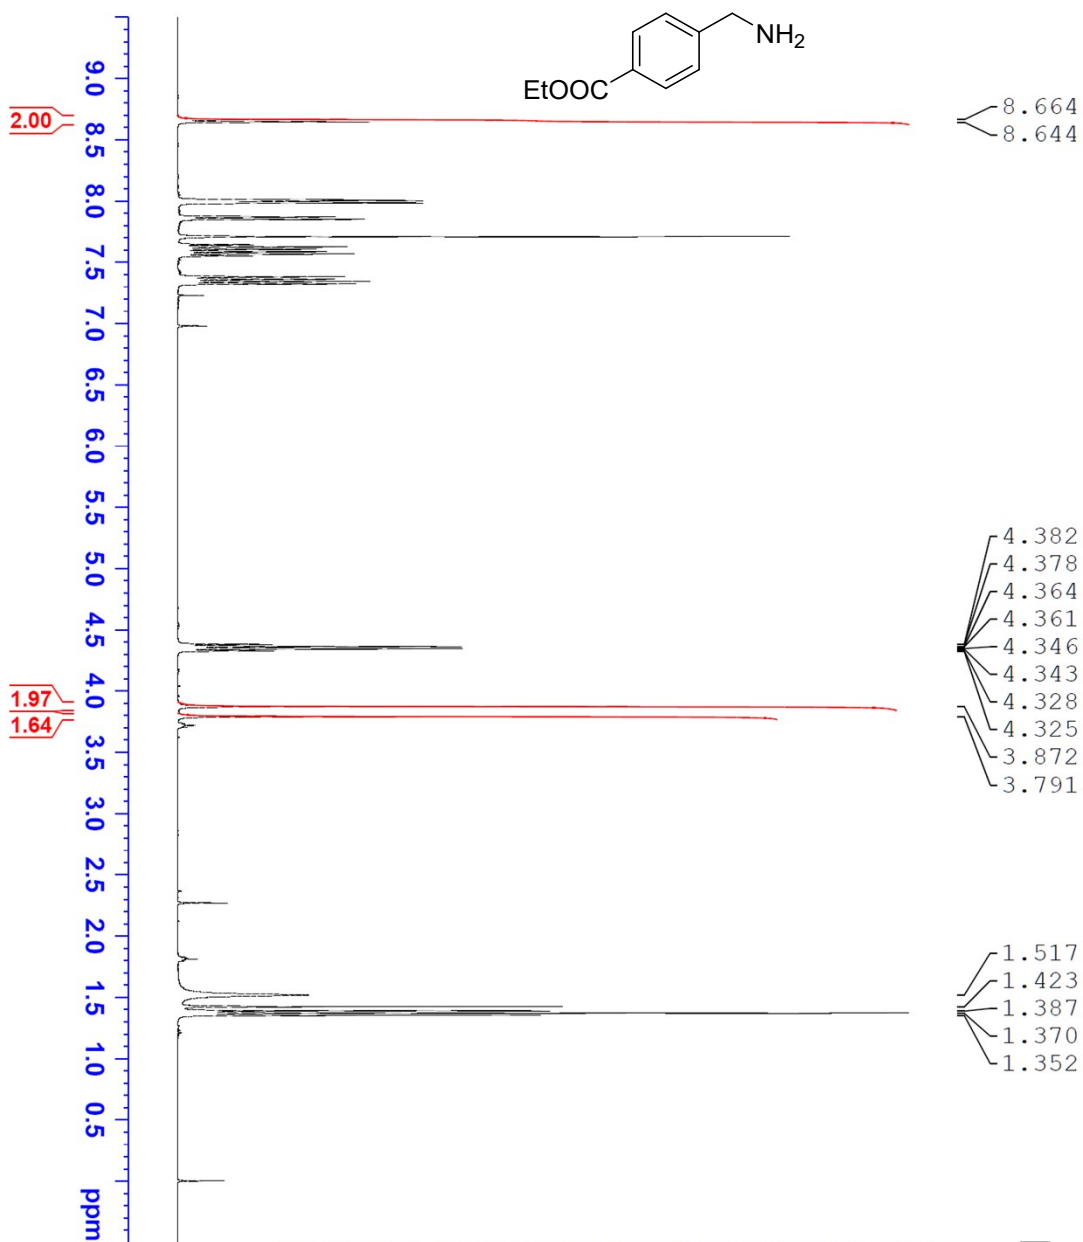

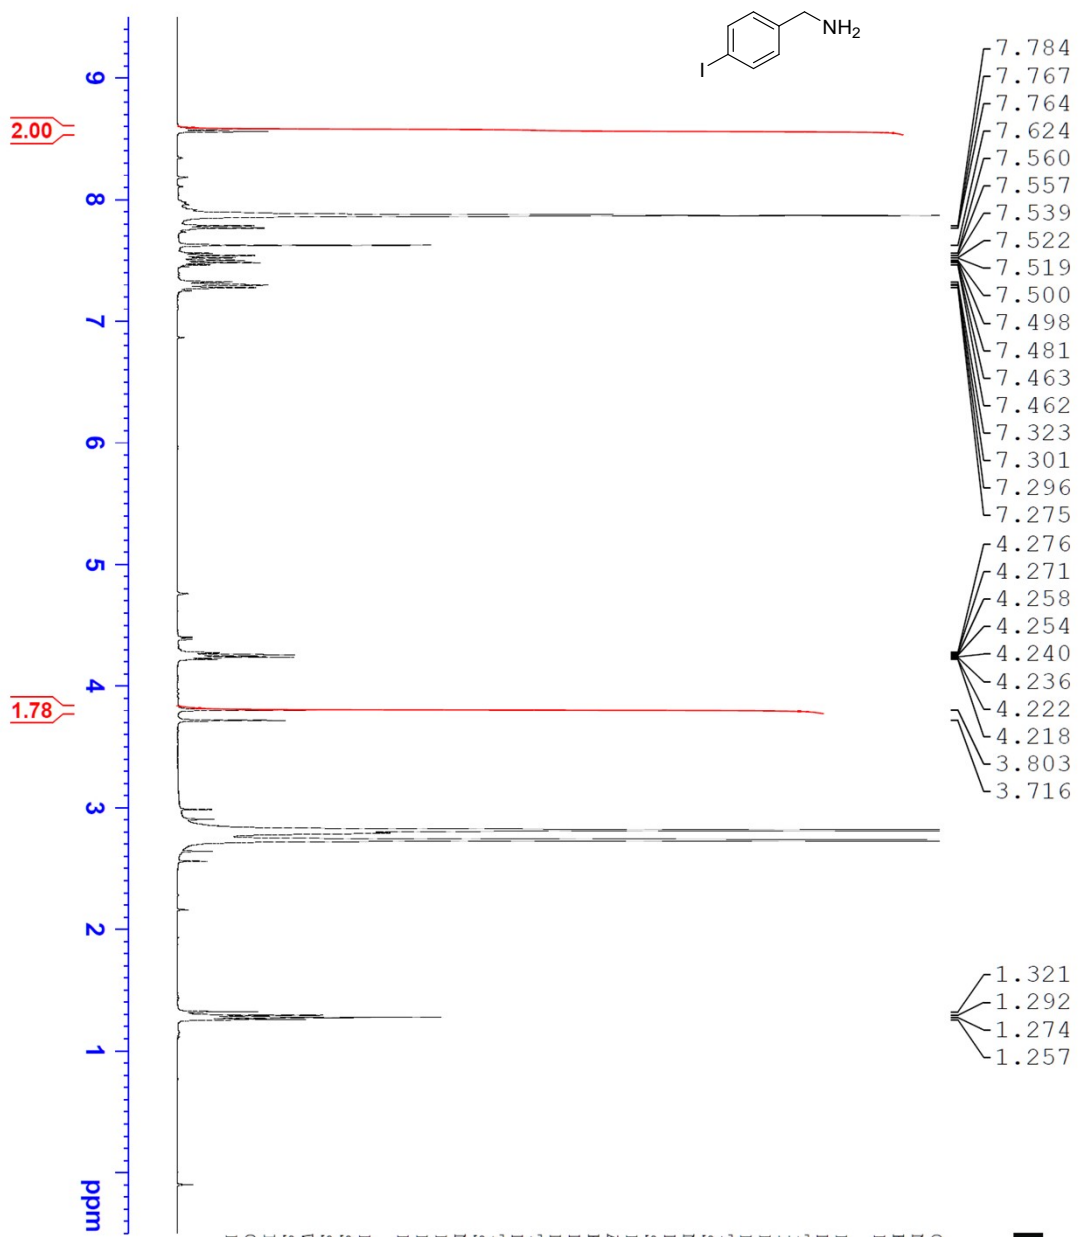

- 7.784
- 7.767
- 7.764
- 7.624
- 7.560
- 7.557
- 7.539
- 7.522
- 7.519
- 7.500
- 7.498
- 7.481
- 7.463
- 7.462
- 7.323
- 7.301
- 7.296
- 7.275
- 4.276
- 4.271
- 4.258
- 4.254
- 4.240
- 4.236
- 4.222
- 4.218
- 3.803
- 3.716
- 1.321
- 1.292
- 1.274
- 1.257

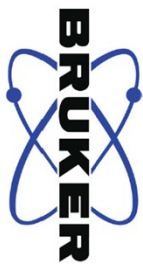

Current Data Parameters  
 NAME 4-Iodonitrile  
 EXPNO 10  
 PROCNO 1

F2 - Acquisition Parameters  
 Date\_ 20220131  
 Time\_ 17.08 h  
 INSTRUM spect  
 PROBHD 2108618\_0155 ( 2330  
 PULPROG zgpg30  
 TD 65536  
 SOLVENT CDCl3  
 NS 16  
 DS 2  
 SWH 8012.820 Hz  
 FIDRES 0.244532 Hz  
 AQ 4.0894465 sec  
 RG 12.7  
 DW 62.400 usec  
 DE 16.92 usec  
 TE 297.6 K  
 D1 1.00000000 sec  
 TD0 1  
 SFO1 400.1324708 MHz  
 NUC1 1H  
 P0 5.00 usec  
 PL 15.00 usec  
 PLW1 11.30000019 W

F2 - Processing parameters  
 SI 65536  
 SF 400.1299345 MHz  
 WDW EM  
 SSB 0  
 LB 0.30 Hz  
 GB 0  
 PC 1.00



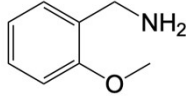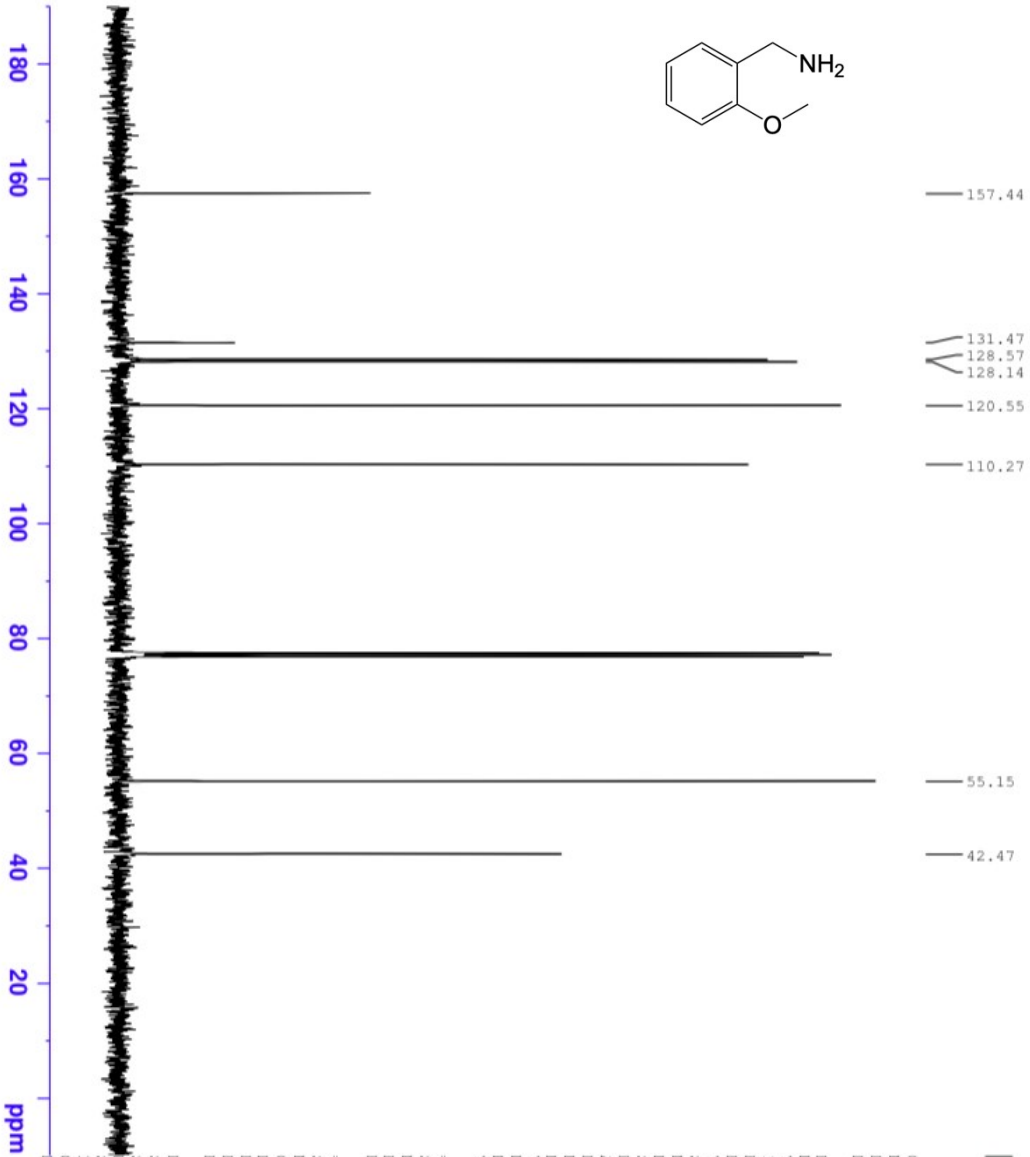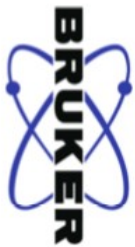

Current Data Parameters  
 NAME No.1-O-Aa-13c  
 EXPNO 1  
 PROCNO 1

F2 - Acquisition Parameters  
 Date\_ 20190829  
 Time 18.38  
 INSTRUM spect  
 PROBRD 5 mm PABBO BB-  
 PULPROG zgpg30  
 TD 65536  
 SOLVENT CDCl3  
 NS 40  
 DS 2  
 SWH 24038.461 Hz  
 FIDRES 0.366798 Hz  
 AQ 1.3631488 sec  
 RG 181  
 DW 20.800 usec  
 DE 6.59 usec  
 TE 303.4 K  
 D1 2.00000000 sec  
 D11 0.03000000 sec  
 TD0 1

==== CHANNEL f1 =====  
 SFO1 100.628298 MHz 10 MHz  
 NUCl 13C 1H  
 P1 10.00 usec 10 usec  
 PL1 53.46578979 W 52 W

==== CHANNEL f2 =====  
 SFO2 400.1316005 MHz 36 MHz  
 NUCl 1H 1H  
 CPDPRG2 waltz16 3M  
 PCPD2 80.00 usec 30 Hz  
 PLM2 11.70547009 W 30 Hz  
 PLM12 0.37015951 W 10  
 PLM13 0.37015951 W 10

F2 - Processing parameters  
 SI 32768  
 SF 100.6127690 MHz  
 WDM EM  
 SSB 0  
 LB 3.00 Hz  
 GB 0  
 PC 1.40

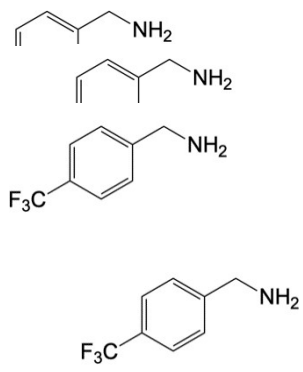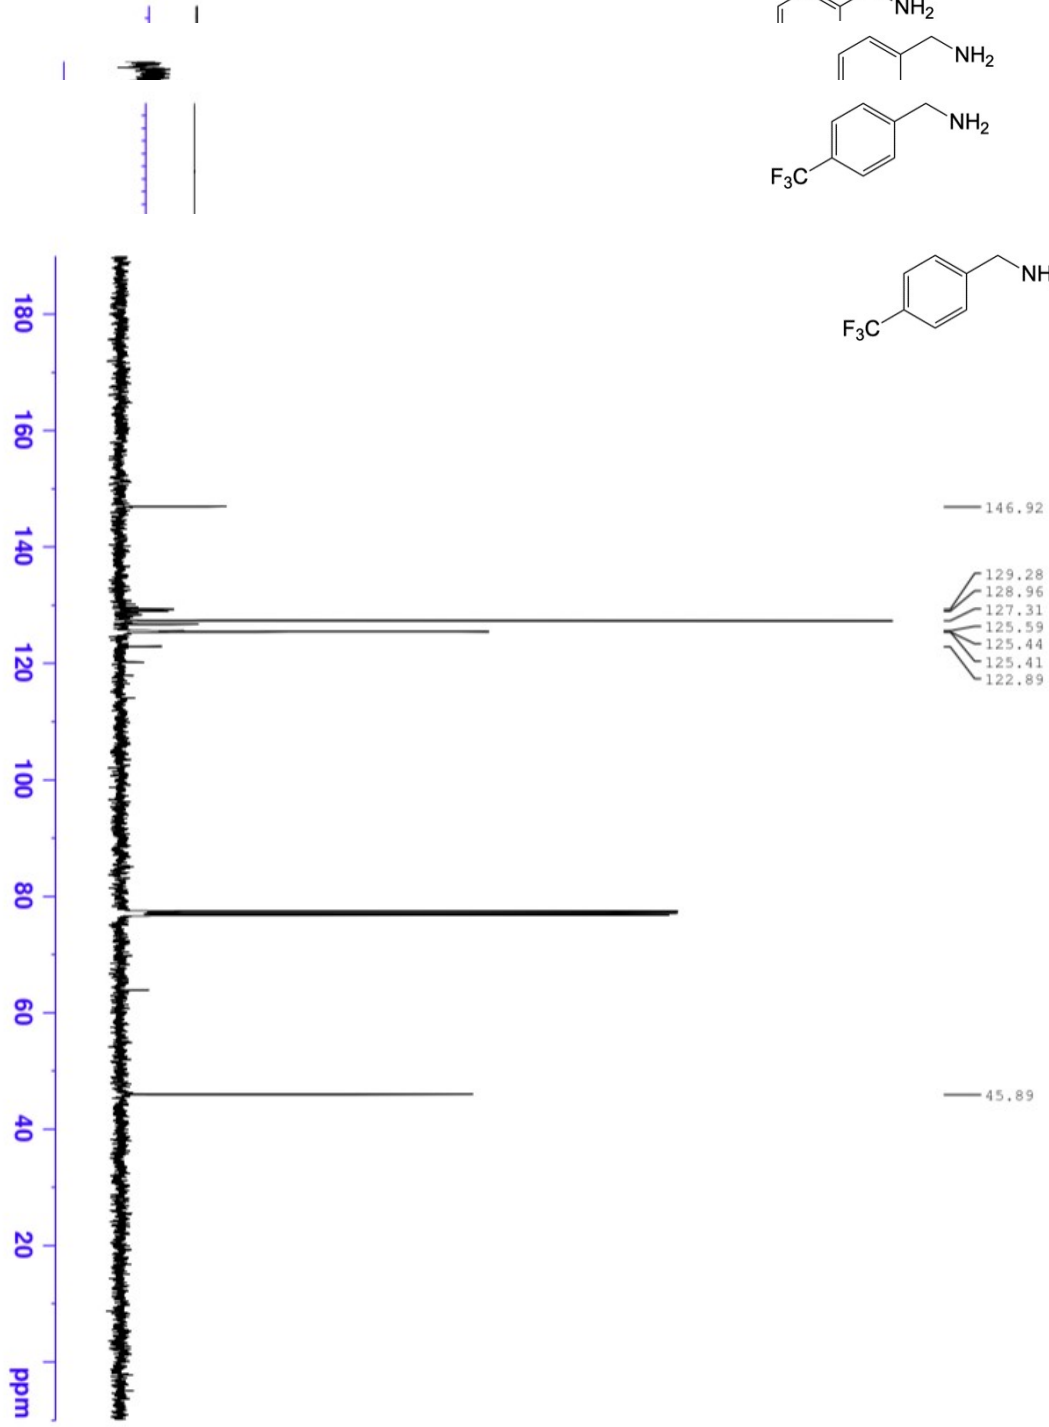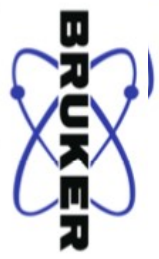

Current Data Parameters  
 NAME No.2-4TFMBA-13C  
 EXPNO 1  
 PROCNO 1

F2 - Acquisition Parameters  
 Date\_ 20191003  
 Time 16.53  
 INSTRUM spect  
 PROBRD 5 mm PABBO BB-  
 PULPROG zgpg30  
 TD 65536  
 SOLVENT CDCl3  
 NS 52  
 DS 4  
 SWH 24038.461 Hz  
 FIDRES 0.366798 Hz  
 AQ 1.3631488 sec  
 RG 181  
 DE 20.800 usec  
 TE 300.2 K  
 D1 2.00000000 sec  
 D11 0.03000000 sec  
 ID0 1

==== CHANNEL f1 =====  
 SF01 100.6228298 MHz  
 NUC1 13C  
 P1 10.00 usec  
 PLW1 53.46578979 W

==== CHANNEL f2 =====  
 SF02 400.1316005 MHz  
 NUC2 1H  
 CPDPRG2 waltz16  
 PCPD2 80.00 usec  
 PLW2 11.70547009 W  
 PLW12 0.37015951 W  
 PLW13 0.37015951 W

F2 - Processing parameters  
 SI 32768  
 SF 100.6127690 MHz  
 WDW EM  
 SSB 0  
 LB 3.00 Hz  
 GB 0  
 PC 1.40

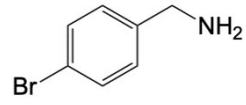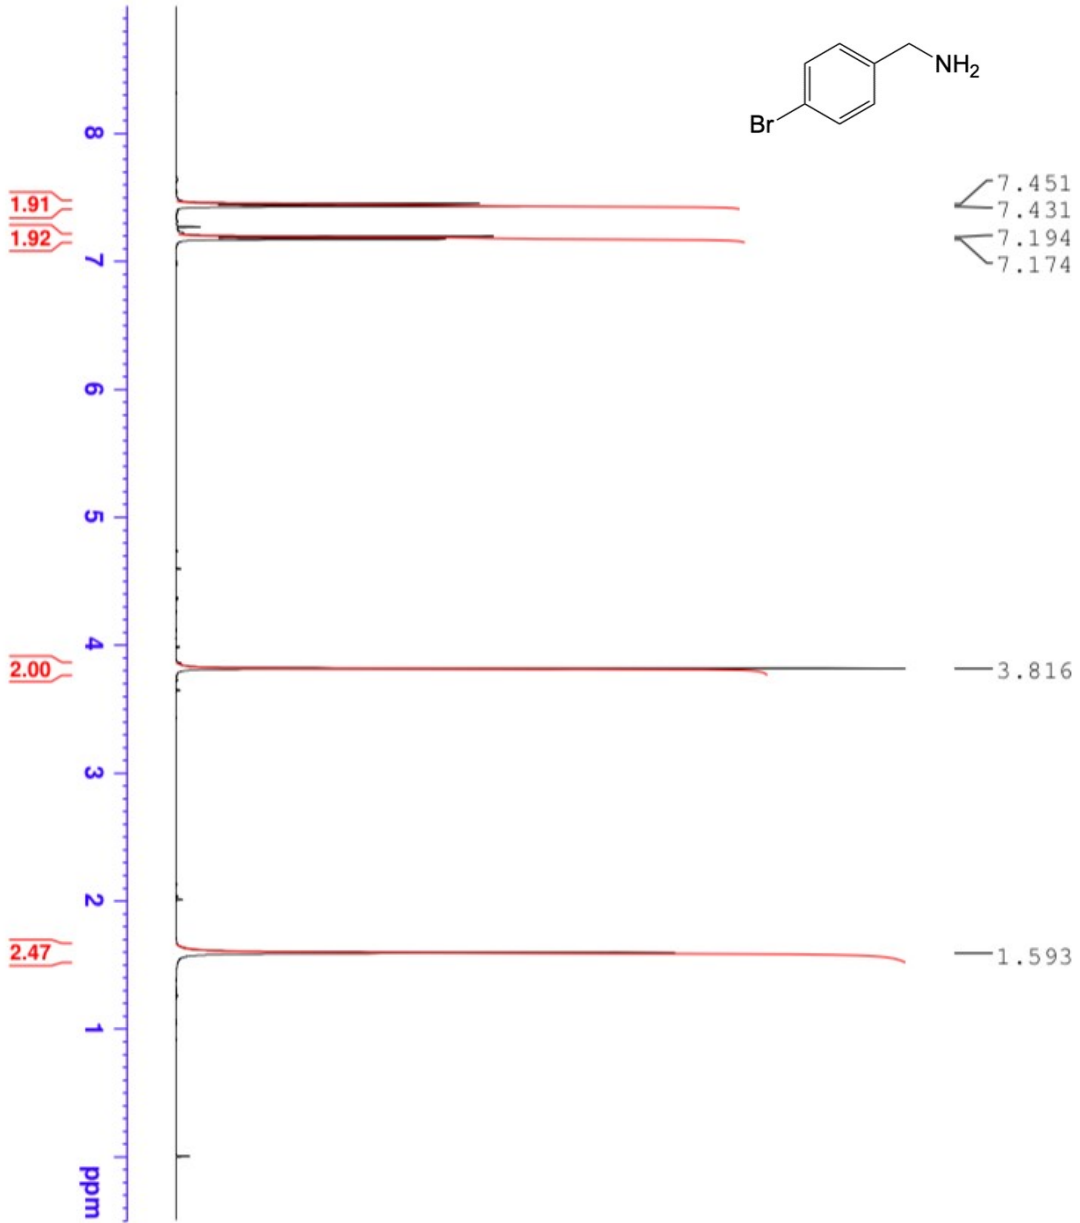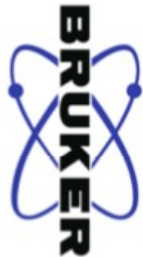

Current Data Parameters  
 NAME No.1-4BBA-1H  
 EXPNO 1  
 PROCNO 1

F2 - Acquisition Parameters

Date\_ 20190719  
 Time 17.32

INSTRUM spect  
 PROBHD 5 mm PABBO BB-

PULPROG zg30  
 TD 65536

SOLVENT CDCl3  
 NS 9

DS 2  
 SMH 8012.820 Hz

FIDRES 0.122266 Hz  
 AQ 4.089465 sec

RG 80.6  
 DW 62.400 usec

DE 6.50 usec  
 TE 301.2 K

D1 1.00000000 sec  
 TD0 1

===== CHANNEL f1 =====

SFO1 400.1324710 MHz  
 NUC1 1H

P1 15.00 usec  
 P1M1 11.89999962 W

F2 - Processing parameters

SI 65536  
 SF 400.1300053 MHz

WDW EM  
 SSB 0

LB 0.30 Hz  
 GB 0  
 PC 1.00

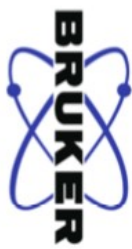

Current Data Parameters  
NAME No.1-4BBA-13C  
EXPNO 1  
PROCNO 1

F2 - Acquisition Parameters

Date\_ 20190719  
Time 17.56  
INSTRUM spect  
PROBHD 5 mm PABBO BB-  
PULPROG zgpg30  
TD 65536  
SOLVENT CDCl3  
NS 292  
DS 4  
SMH 24038.461 Hz  
FIDRES 0.366798 Hz  
AQ 1.3631488 sec  
RG 114  
DW 20.800 usec  
DE 6.50 usec  
TE 303.0 K  
D1 2.00000000 sec  
D11 0.03000000 sec  
TD0 1

==== CHANNEL f1 =====

SFO1 100.628298 MHz  
NUC1 13C  
P1 10.00 usec  
P1M1 53.46578979 W

==== CHANNEL f2 =====

SFO2 400.1316005 MHz  
NUC2 1H  
CPDPRG12 waltz16  
PCPD2 80.00 usec  
PLM2 11.70547009 W  
PLM12 0.37015951 W  
PLM13 0.37015951 W

F2 - Processing parameters

SI 32768  
SF 100.6127690 MHz  
WDW EM  
SSB 0  
GB 0  
EC 1.40

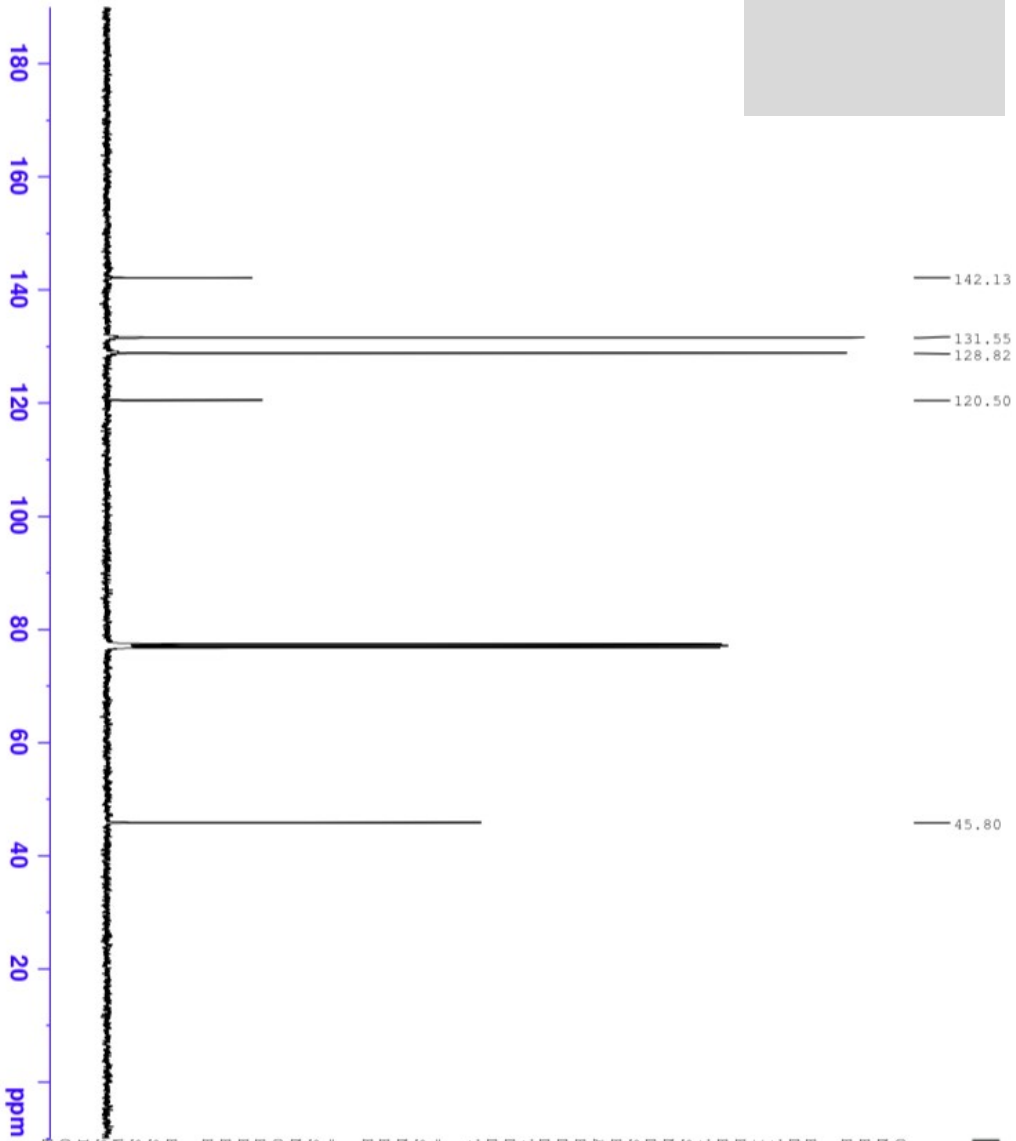

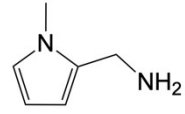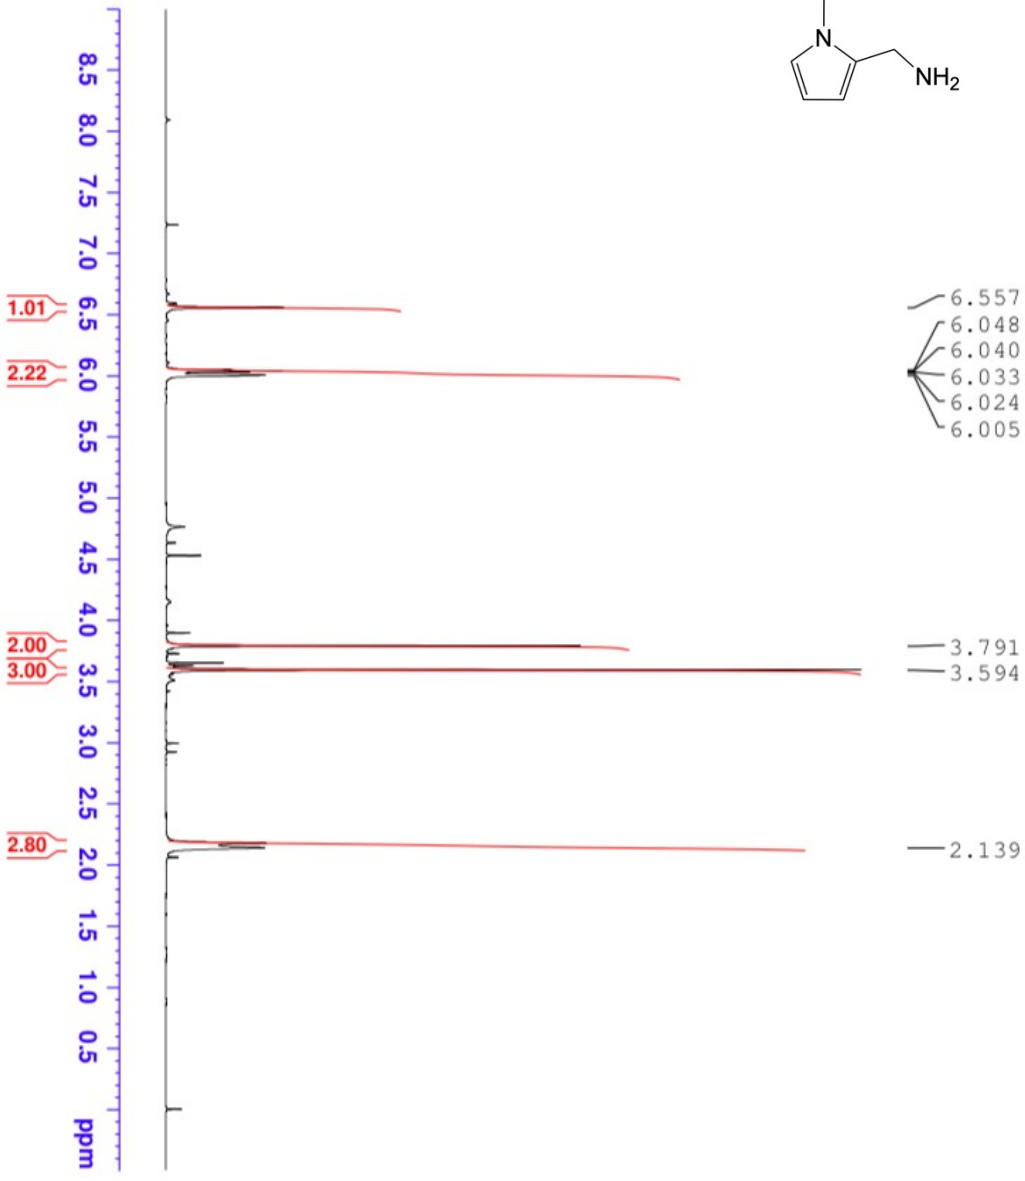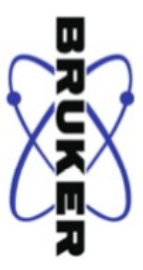

Current Data Parameters  
 NAME No.2-ZPCA-25h-1H  
 EXPNO 1  
 PROCNO 1

F2 - Acquisition Parameters  
 Date\_ 20191029  
 Time 17.05  
 INSTRUM spect  
 PROBHID 5 mm F4BBO BB-  
 PULPROG zg30  
 TD 65336  
 ID CDCl3  
 SOLVENT CDCl3  
 NS 9  
 DS 2

SMH 8012.820 Hz  
 FIDRES 0.122266 Hz  
 AQ 4.0894465 sec  
 RG 32  
 DW 62.400 usec  
 DE 6.50 usec  
 TE 298.3 K  
 D1 1.00000000 sec  
 TD0 1

==== CHANNEL f1 =====  
 SFO1 400.1324710 MHz  
 NUC1 1H  
 P1 15.00 usec  
 PLM1 11.89999962 W

F2 - Processing parameters  
 SI 65336  
 SF 400.1300195 MHz  
 WDW EM  
 SSB 0  
 LB 0.30 Hz  
 GB 0  
 PC 1.00

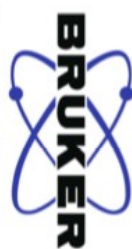

Current Data Parameters  
NAME No.2-MZPCA-25h-13C  
EXPN0 1  
PROCNO 1

F2 - Acquisition Parameters  
Date\_ 20191029  
Time\_ 17.10  
INSTRUM spect  
PROBHD 5 mm PABBO BB-  
PULPROG zgpg30  
TD 65536  
SOLVENT CDCl3  
NS 16  
DS 4

SWH 24038.461 Hz  
FIDRES 0.366798 Hz  
AQ 1.3631488 sec  
RG 203  
DE 20.800 usec  
TE 6.50 usec  
D1 298.7 K  
D11 2.00000000 sec  
TD0 0.03000000 sec  
1

==== CHANNEL f1 =====  
SF01 100.628298 MHz  
NUC1 13C  
P1 10.00 usec  
PLM1 53.46578979 W

==== CHANNEL f2 =====  
SF02 400.1316005 MHz  
NUC2 1H  
CPDPRG2 waltz16  
PCPD2 80.00 usec  
PLM2 11.70547009 W  
PLM12 0.37015951 W  
PLM13 0.37015951 W

F2 - Processing parameters  
SI 32768  
SF 100.6127690 MHz  
WDW EM  
SSB 0  
TB 3.00 Hz  
GB 0  
PC 1.40

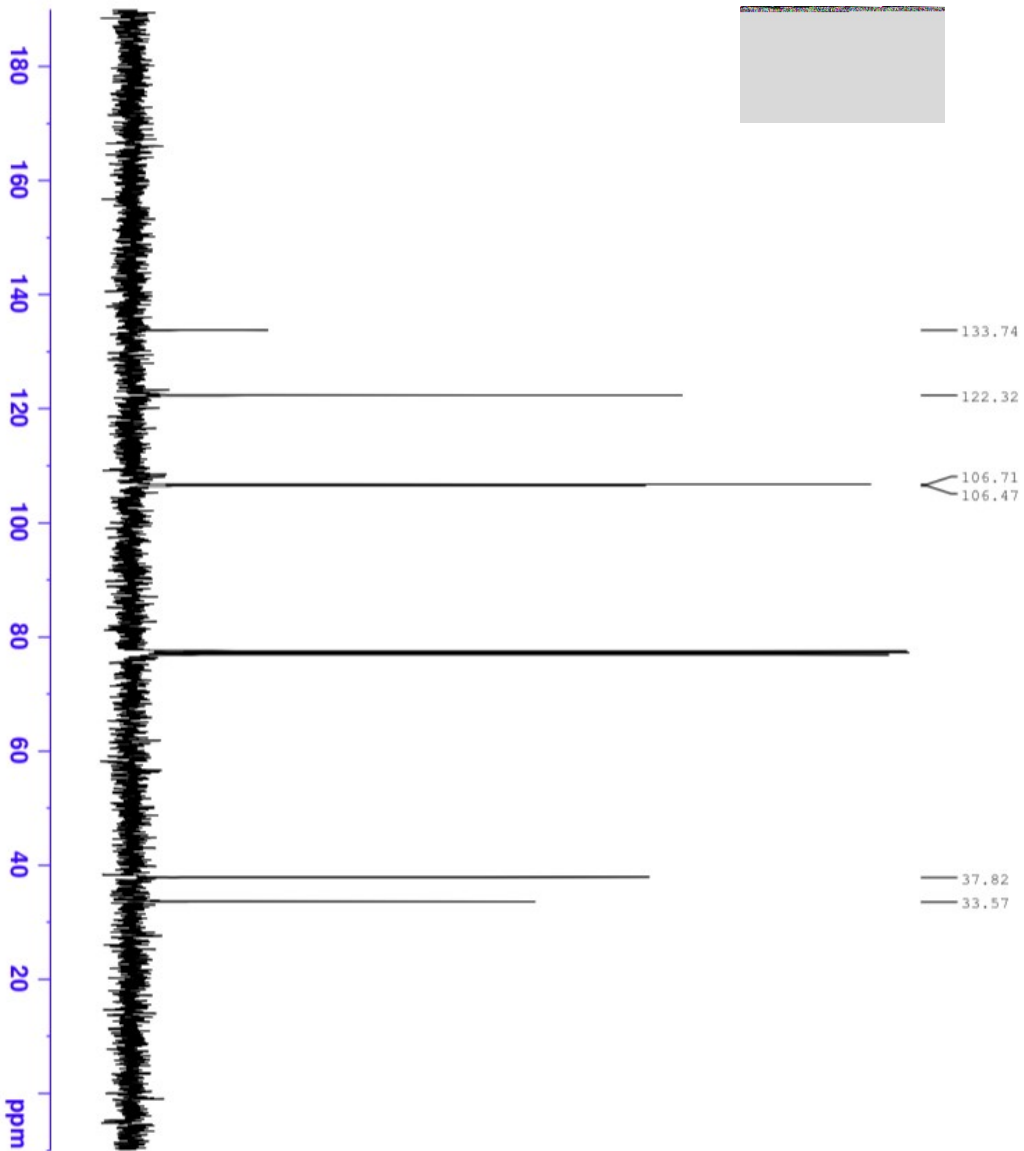

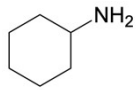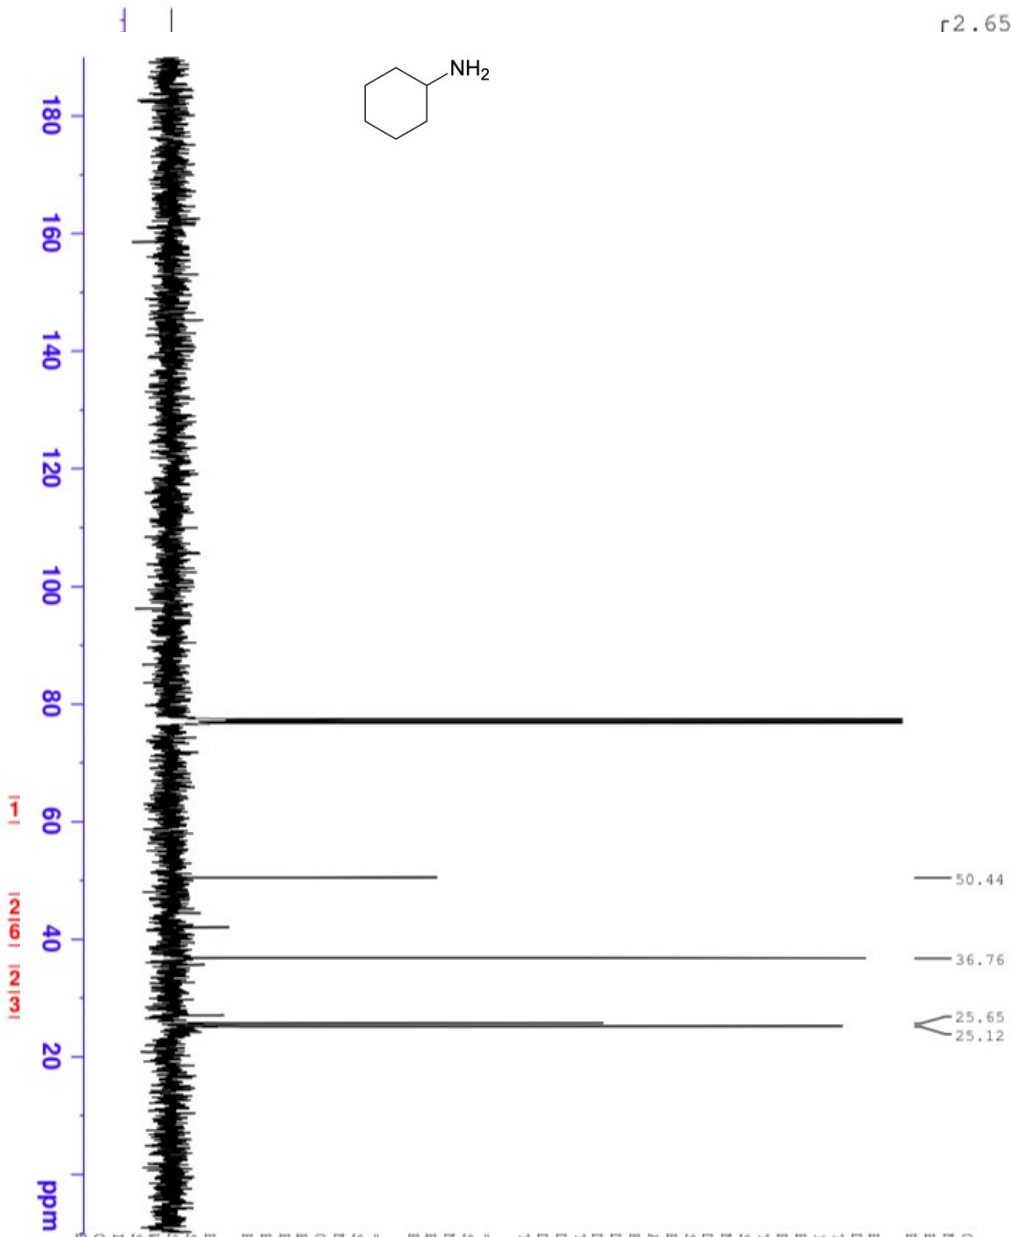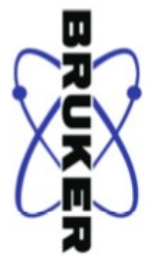

Current Data Parameters  
 NAME No.1-CH-CH-2-13C-2  
 EXPNO 1  
 PROCNO 1

F2 - Acquisition Parameters  
 Date\_ 20190917  
 Time 10.07

INSTRUM 5 mm PABBO BB-  
 PROBHD spect  
 PULPROG zgpg30  
 TD 65536  
 SOLVENT CDCl3  
 NS 35

DS 4  
 SMH 24038.461 Hz  
 FIDRES 0.366798 Hz  
 AQ 1.3651488 sec  
 RG 203

DW 20.800 usec  
 DE 6.50 usec  
 TE 299.4 K  
 D1 2.00000000 sec  
 D11 0.03000000 sec  
 TD0 1

==== CHANNEL f1 =====  
 SFO1 100.6228298 MHz  
 NUC1 13C  
 P1 10.00 usec  
 PLW1 53.46578979 W

==== CHANNEL f2 =====  
 SFO2 400.1316005 MHz  
 NUC2 1H  
 CPDPRG12 waltz16  
 PCPD2 80.00 usec  
 PLW2 11.70547009 W  
 PLW12 0.37015951 W  
 PLW13 0.37015951 W

F2 - Processing parameters  
 SI 32768  
 SF 100.6127690 MHz  
 WDW EM  
 SSB 0  
 LB 3.00 Hz  
 GB 0  
 FC 1.40

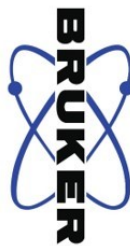

Current Data Parameters  
 NAME 4-phenyl-2-butanone-210402  
 EXPNO 10  
 PROCNO 1

F2 - Acquisition Parameters  
 Date\_ 20210402  
 Time 16.34  
 INSTRUM spect  
 PROBD 5 mm PABBO BB-  
 PULPROG zg30  
 TD 65536  
 SOLVENT CDCl3  
 NS 16  
 DS 2  
 SMH 8012.820 Hz  
 FIDRES 0.122266 Hz  
 AQ 4.0894465 sec  
 RG 32  
 DW 62.400 usec  
 DE 6.50 usec  
 TE 299.4 K  
 D1 1.00000000 sec  
 TD0 1

===== CHANNEL f1 =====  
 SFO1 400.1324710 MHz  
 NUC1 1H  
 P1 15.00 usec  
 PLW1 11.89999962 W  
 F2 - Processing parameters  
 SI 65536  
 SF 400.1300153 MHz  
 MDW EM  
 SSB 0  
 LB 0.30 Hz  
 GB 0  
 PC 1.00

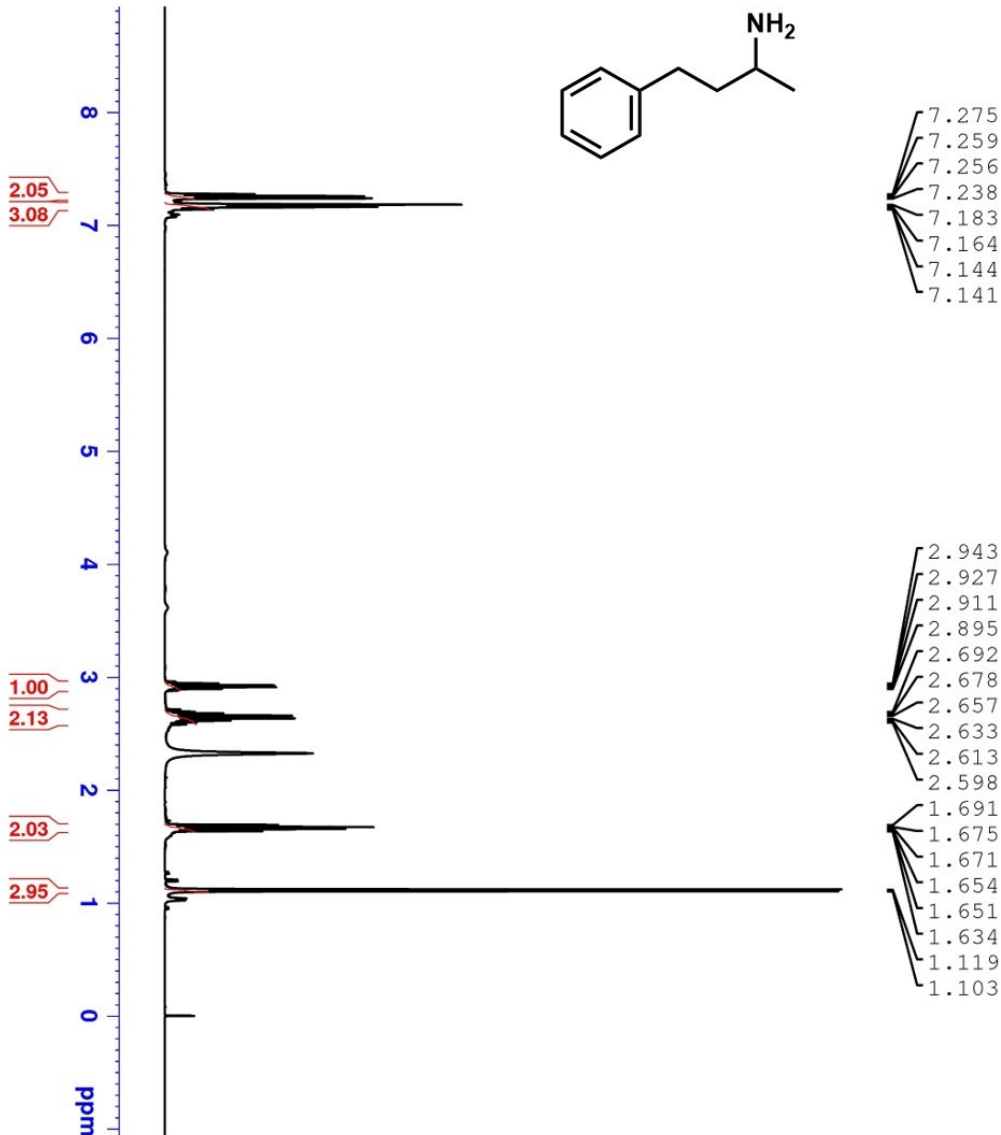





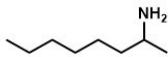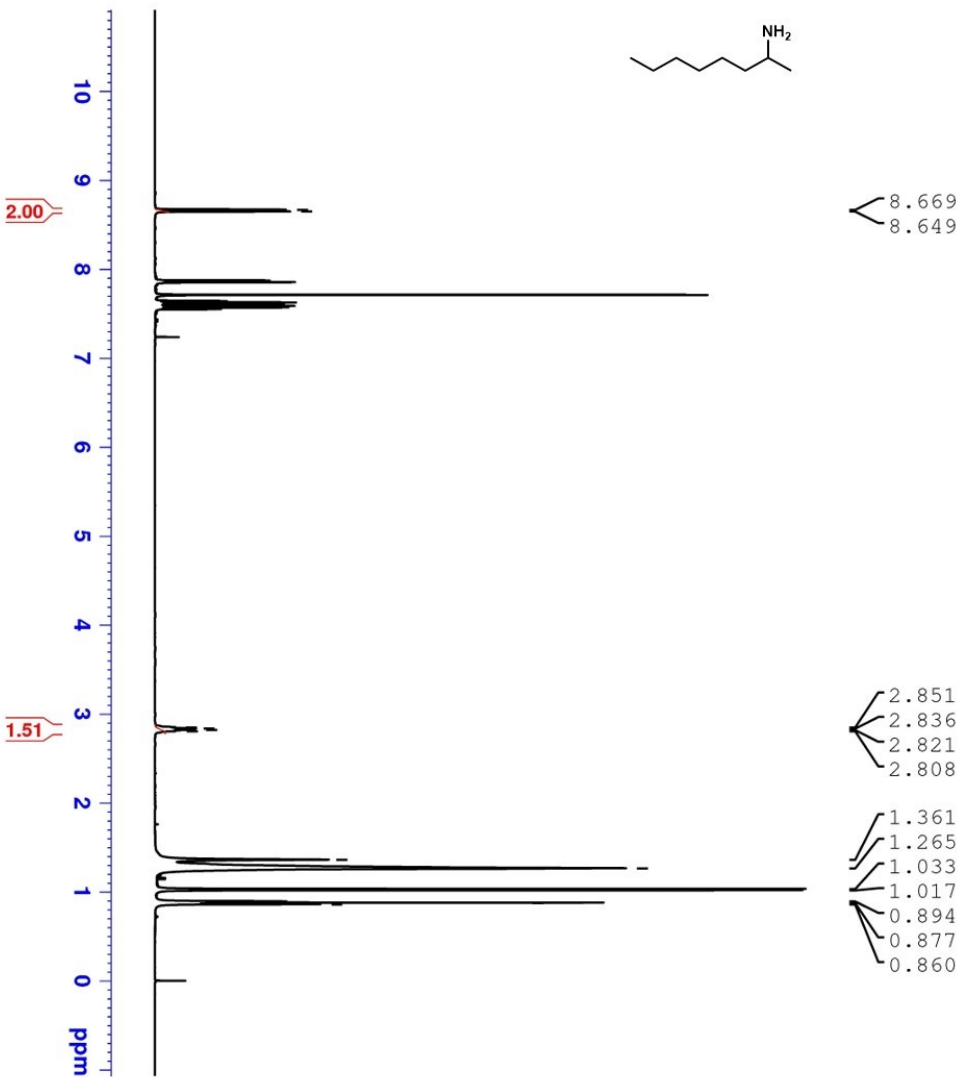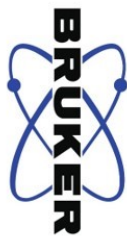

Current Data Parameters  
 NAME 2-octanone-210422  
 EXPNO 10  
 PROCNO 1

F2 - Acquisition Parameters  
 Date\_ 20210422  
 Time 10.06  
 INSTRUM spect  
 PROBHD 5 mm PABBO BB-  
 PULPROG zg30  
 TD 65536  
 SOLVENT CDCl3  
 NS 16  
 DS 2  
 SWE 8012.820 Hz  
 FIDRES 0.122266 Hz  
 AQ 4.0894465 sec  
 RG 32  
 DW 62.400 usec  
 DE 6.50 usec  
 TE 299.2 K  
 D1 1.00000000 sec  
 TDO 1

----- CHANNEL f1 -----  
 SFO1 400.1324710 MHz  
 NUC1 1H  
 P1 15.00 usec  
 PLW1 11.89999962 W

F2 - Processing parameters  
 SI 65536  
 SF 400.1300189 MHz  
 WDW EM  
 SSB 0  
 LB 0.30 Hz  
 GB 0  
 PC 1.00

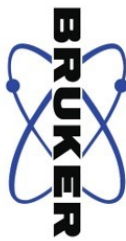

Current Data Parameters  
 NAME 2-dodecanone-210422  
 EXPRNO 10  
 PROCNO 1

F2 - Acquisition Parameters

Date\_ 20210422  
 Time\_ 10.11  
 INSTRUM spect  
 PROBHD 5 mm PABBO BH-  
 PULPROG zg30  
 TD 65536  
 SOLVENT CDCl3  
 NS 16  
 DS 2  
 SWH 8012.820 Hz  
 FIDRES 0.122266 Hz  
 AQ 4.0894465 sec  
 RG 32  
 DW 62.400 usec  
 DE 6.50 usec  
 TE 299.2 K  
 DI 1.00000000 sec  
 TD0 1

===== CHANNEL f1 =====  
 SFO1 400.1324710 MHz  
 NUC1 1H  
 P1 15.00 usec  
 PLWL 11.89999962 W

F2 - Processing parameters

SI 65536  
 SF 400.1300145 MHz  
 WDW EM  
 SSB 0  
 LB 0.30 Hz  
 GB 0  
 PC 1.00

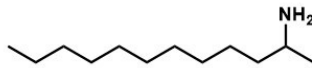

8.680  
8.659

2.864  
2.850  
2.835  
2.821

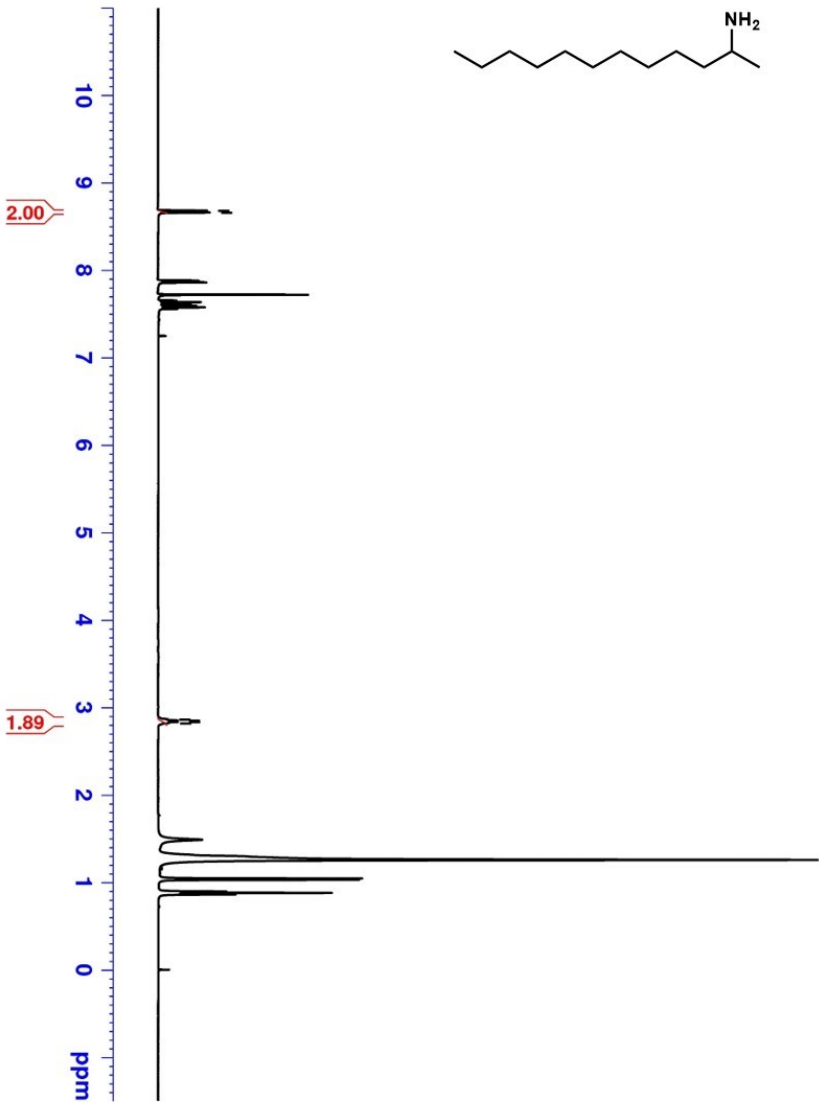

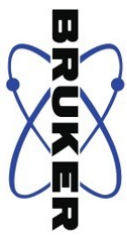

Current Data Parameters  
NAME 2-adamantone  
EXPNO 10  
PROCNO 1

F2 - Acquisition Parameters  
Date\_ 20210419  
Time 19.43  
INSTRUM spect  
PROBHD 5 mm PABBO BB-  
PULPROG zg30  
TD 65536  
SOLVENT CDCl3  
NS 16  
DS 2  
SWH 8012.820 Hz  
FIDRES 0.122266 Hz  
AQ 4.089465 sec  
RG 64  
DM 62.400 usec  
DE 6.50 usec  
TE 299.9 K  
D1 1.00000000 sec  
TD0 1

==== CHANNEL f1 =====  
SFO1 400.1324710 MHz  
NUC1 1H  
P1 15.00 usec  
PLW1 11.8999962 W

F2 - Processing parameters  
SI 65536  
SF 400.1300141 MHz  
WDW EM  
SSB 0  
LB 0.30 Hz  
GB 0  
PC 1.00

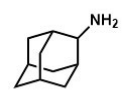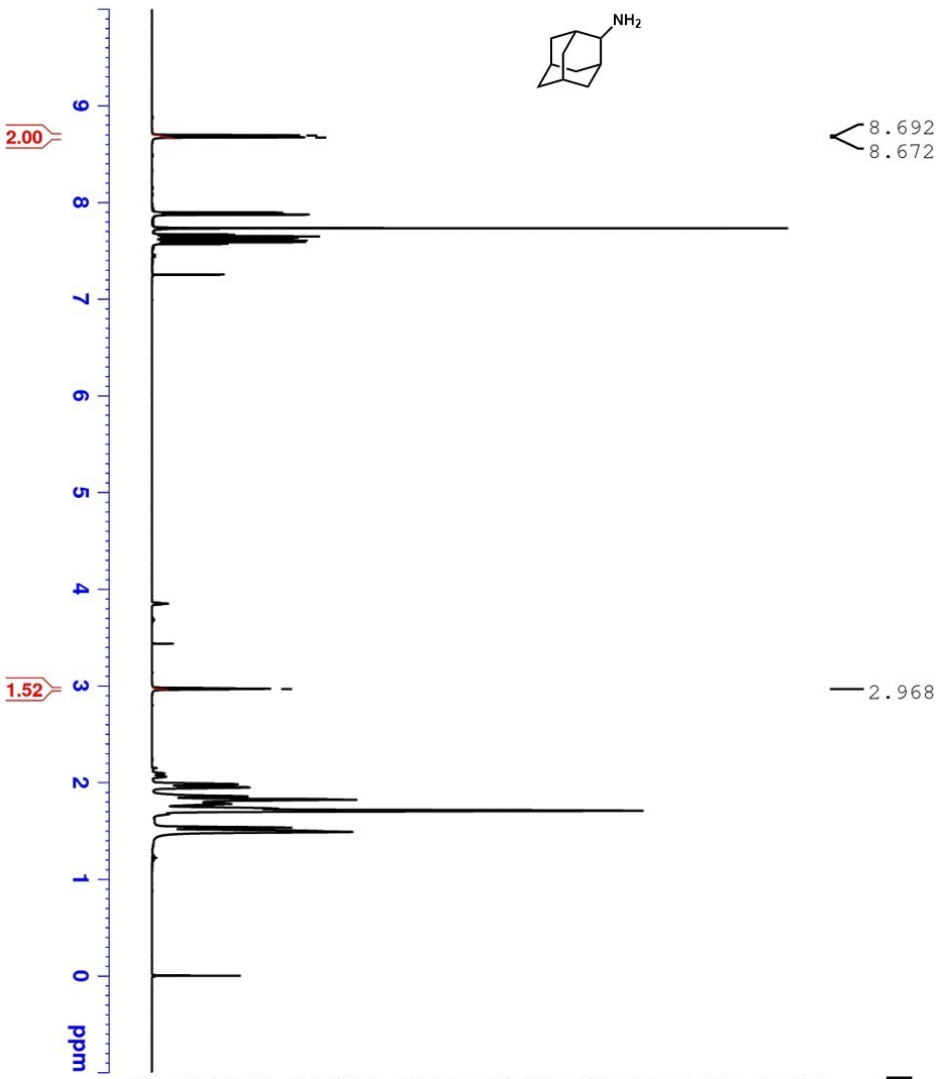

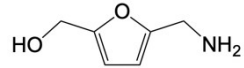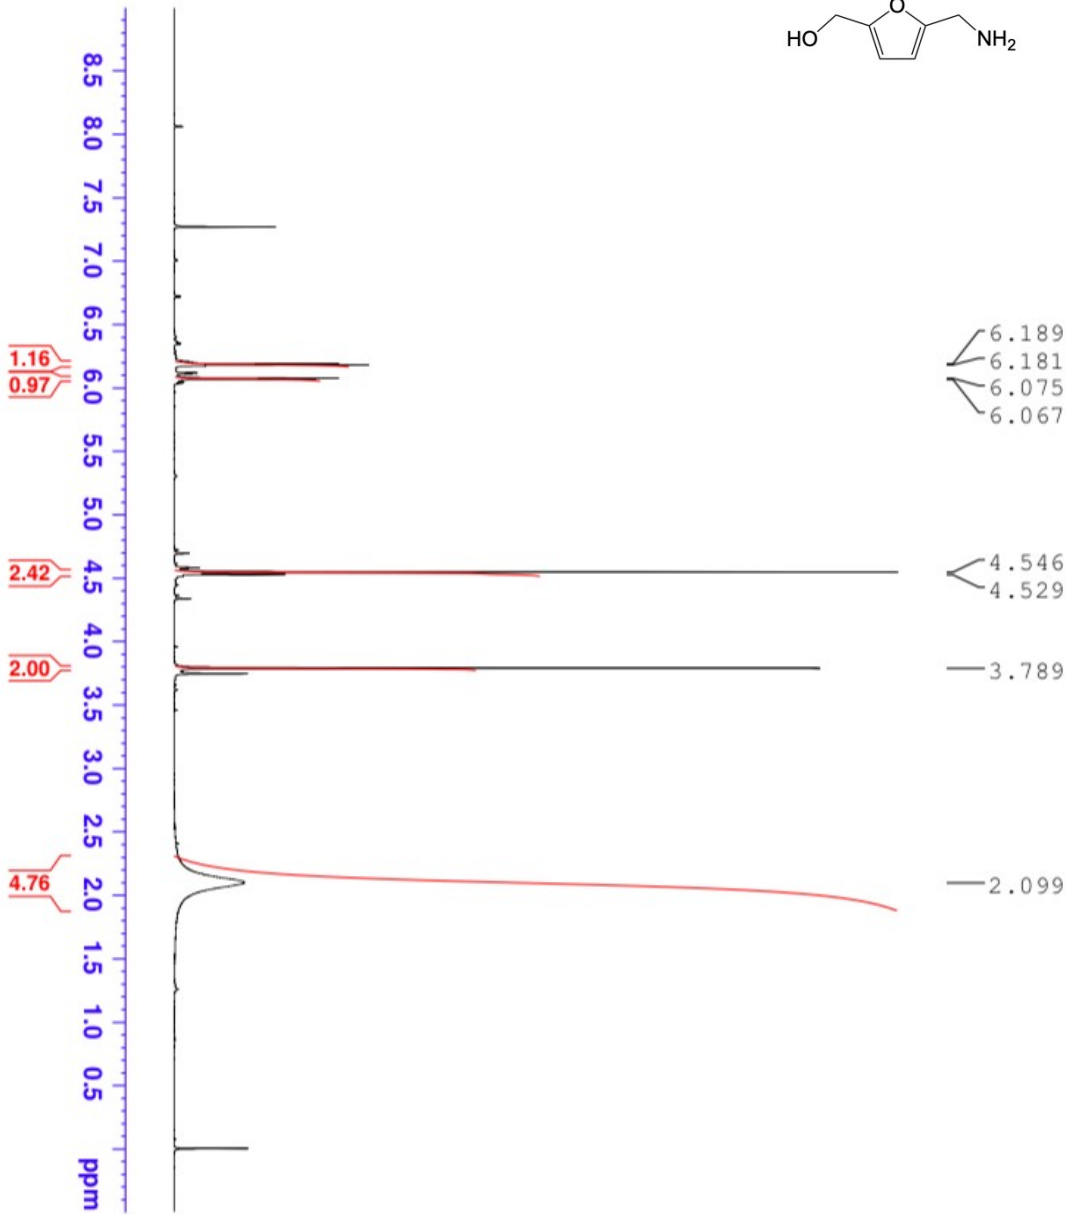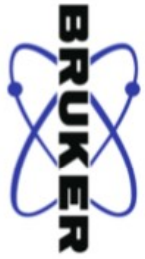

Current Data Parameters  
 NAME No.1-5HMF-2-1H  
 EXPNO 1  
 PROCNO 1

F2 - Acquisition Parameters  
 Date\_ 20190830  
 Time 15.35

INSTRUM spect  
 PROBHD 5 mm PARBO BB-  
 PULPROG zg30  
 TD 65536  
 SOLVENT CDCl3

NS 9  
 DS 2  
 SWH 8012.820 Hz  
 FIDRES 0.122266 Hz  
 AQ 4.089465 sec

RG 181  
 DW 62.400 usec  
 DE 6.50 usec  
 TE 302.0 K  
 D1 1.00000000 sec  
 TD0 1

==== CHANNEL f1 =====  
 SFO1 400.1324710 MHz  
 NUC1 1H  
 P1 15.00 usec  
 P1M1 11.89999962 W

F2 - Processing parameters  
 SI 65536  
 SF 400.1300058 MHz  
 WDW EM  
 SSB 0  
 LB 0.30 Hz  
 GB 0  
 PC 1.00

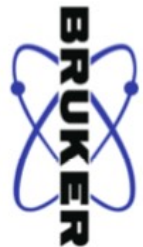

Current Data Parameters  
NAME No.1-SHM-2-13C  
EXPNO 1  
PROCNO 1

F2 - Acquisition Parameters

Date\_ 20190830  
Time 15.43  
INSTRUM spect  
PROBHD 5 mm PABBO BB-  
PULPROG zgpg30  
TD 65536  
SOLVENT CDCl3  
NS 80  
DS 4  
SMH 24038.461 Hz  
FIDRES 0.366798 Hz  
AQ 1.3631498 sec  
RG 114  
DE 20.800 usec  
TE 303.3 K  
D1 2.00000000 sec  
D11 0.03000000 sec  
TD0 1

==== CHANNEL f1 =====  
SF01 100.6228298 MHz  
NUC1 13C  
P1 10.00 usec  
P1M1 53.46578979 W

==== CHANNEL f2 =====  
SF02 400.1316005 MHz  
NUC2 1H  
CPCPRGf2 waltz16  
PCPD2 80.00 usec  
P1M2 11.70547009 W  
P1M12 0.37015951 W  
P1M13 0.37015951 W

F2 - Processing parameters  
SI 32768  
SF 100.6127690 MHz  
MDW EM  
SSB 0  
LB 3.00 Hz  
GB 0  
PC 1.40

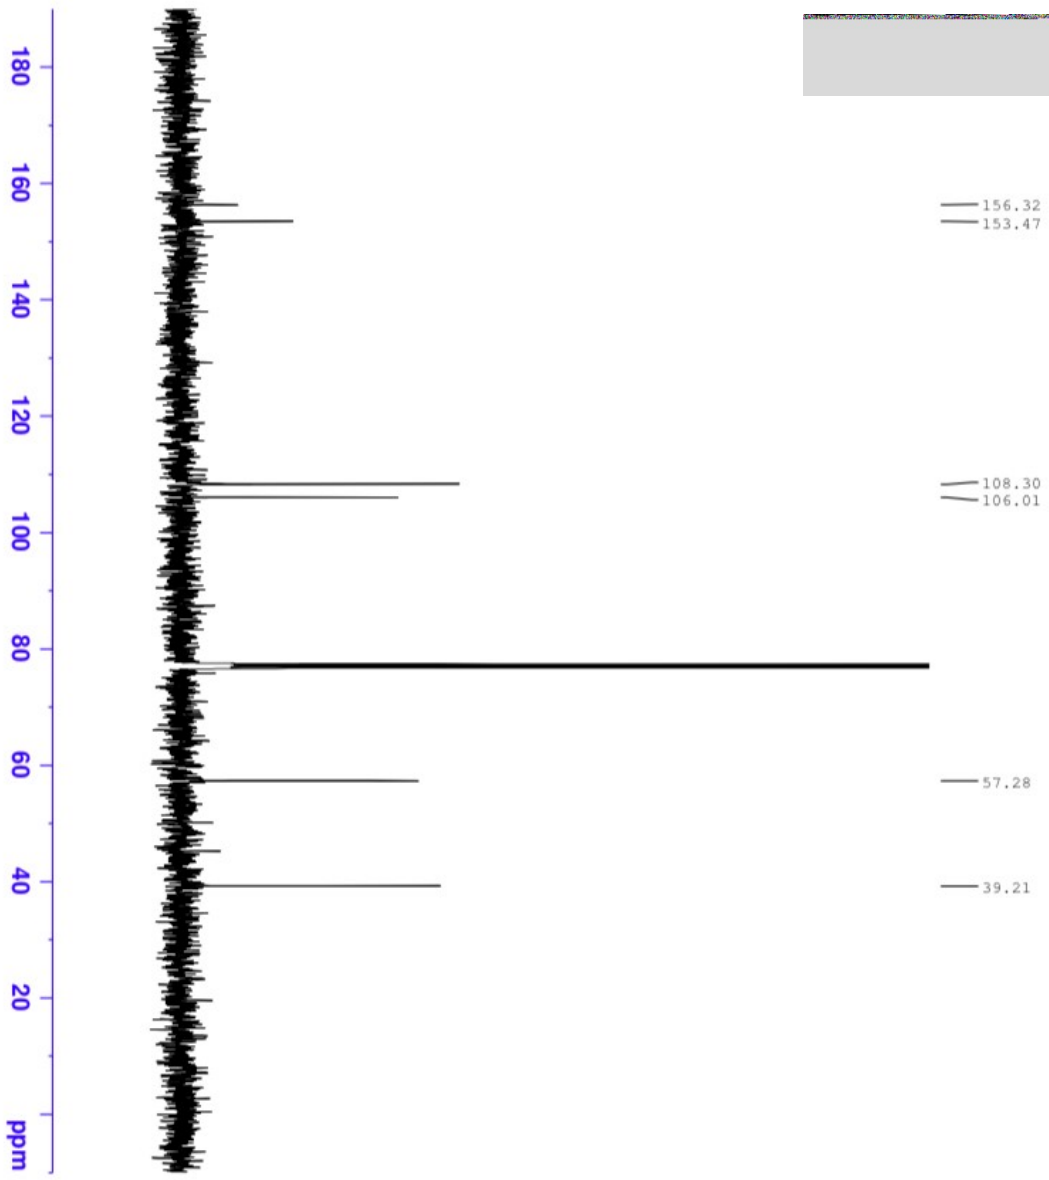

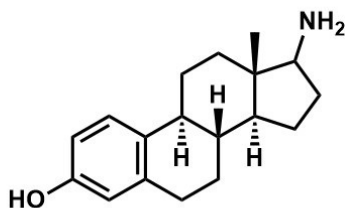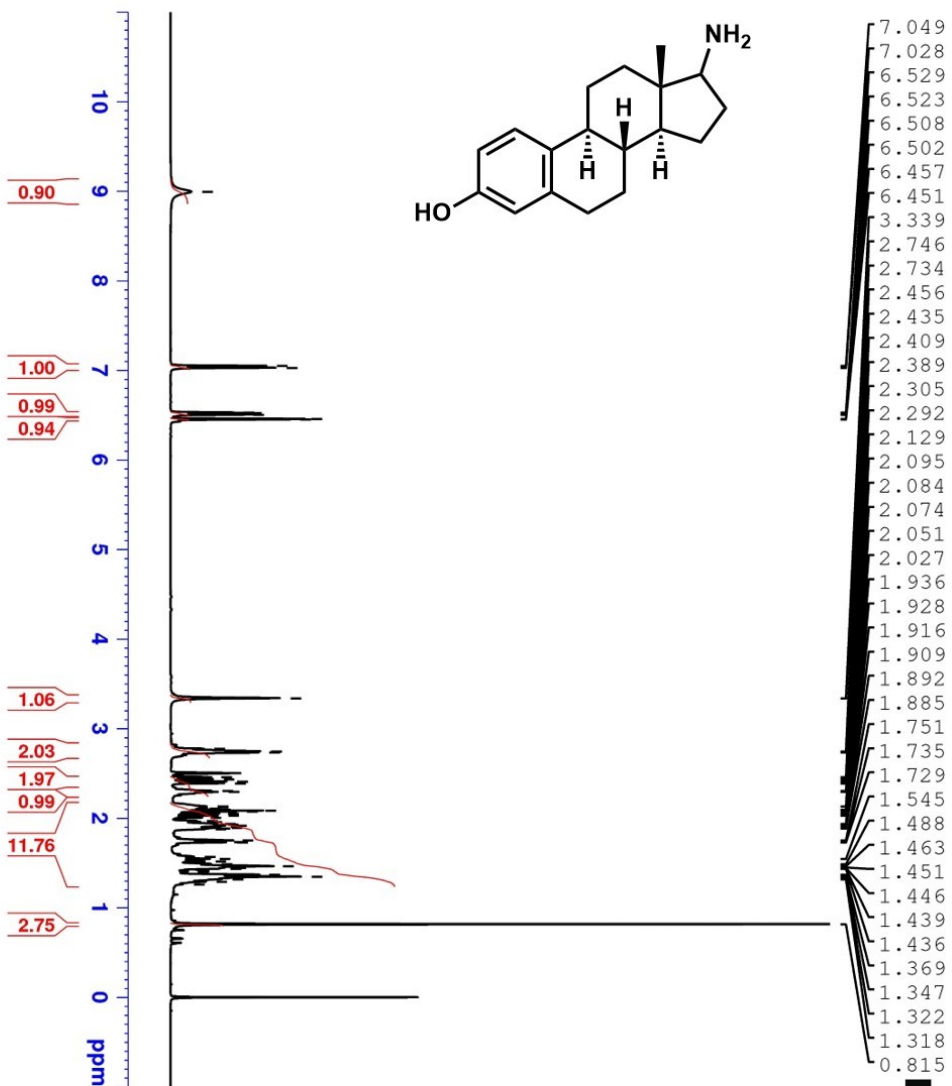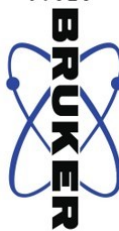

Current Data Parameters  
 NAME estrone-210426-1H  
 EXPNO 20  
 PROCNO 1

F2 - Acquisition Parameters  
 Date\_ 20210426  
 Time\_ 10.57  
 INSTRUM spect  
 PROBHD 5 mm PABBO BB-  
 PULPROG zg30  
 TD 65536  
 SOLVENT DMSO  
 NS 16  
 DS 2  
 SWH 8012.820 Hz  
 FIDRES 0.122266 Hz  
 AQ 4.089465 sec  
 RG 57  
 DW 62.400 usec  
 DE 6.50 usec  
 TE 299.4 K  
 D1 1.00000000 sec  
 TD0 1

===== CHANNEL f1 =====  
 SFO1 400.1324710 MHz  
 NUC1 1H  
 P1 15.00 usec  
 PLW1 11.89999662 W  
 F2 - Processing parameters  
 SI 65536  
 SF 400.1300025 MHz  
 WDM EM  
 SSB 0  
 LB 0.30 Hz  
 GB 0  
 PC 1.00

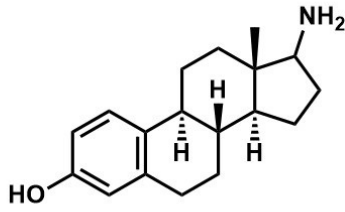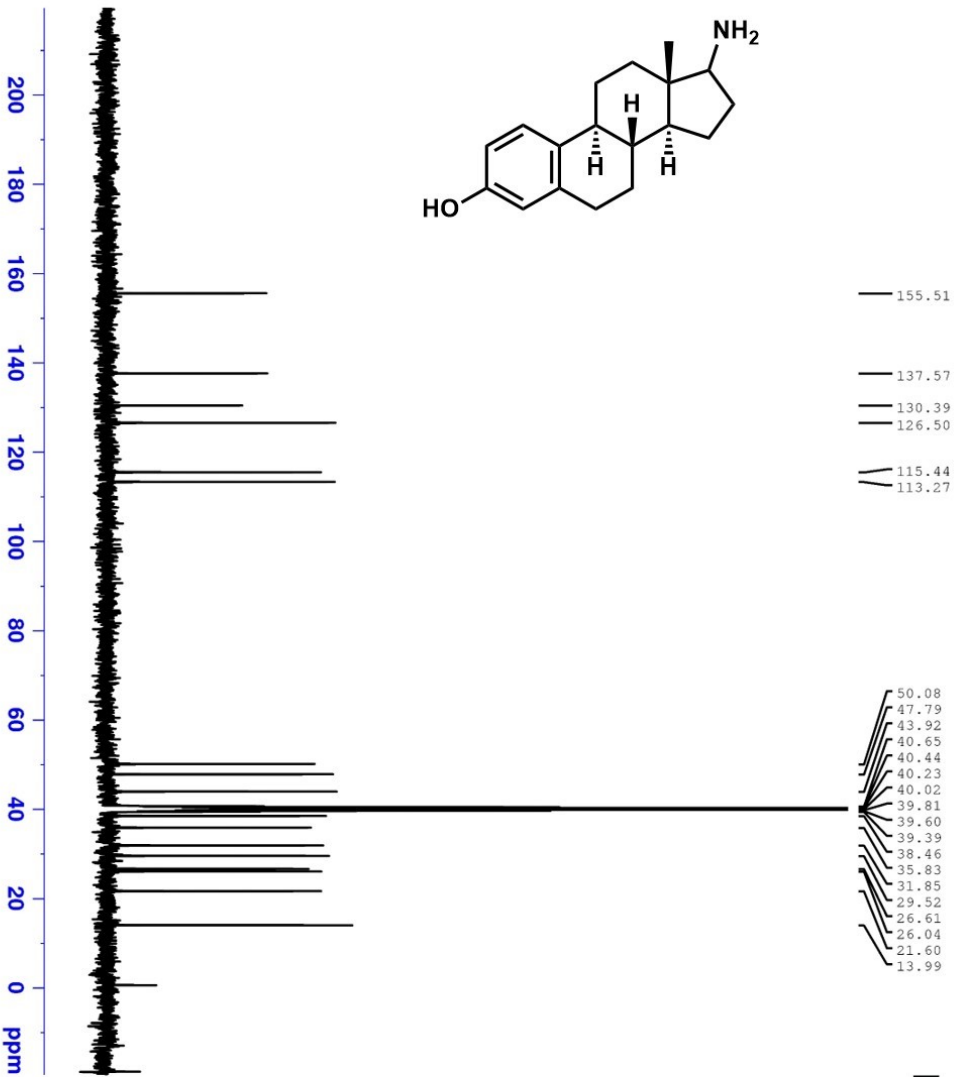

155.51  
137.57  
130.39  
126.50  
115.44  
113.27

50.08  
47.79  
43.92  
40.65  
40.44  
40.23  
40.02  
39.81  
39.60  
39.39  
38.46  
35.83  
31.85  
29.52  
26.61  
26.04  
21.60  
13.99

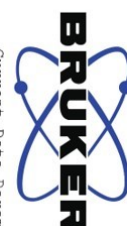

Current Data Parameters  
NAME estrone-210426-13C  
EXPNO 20  
PROCNO 1

F2 - Acquisition Parameters  
Date\_ 20210426  
Time 11.03

INSTRUM spect  
PROBHD 5 mm PABBO BB-  
PULPROG zgpg30  
TD 65536  
SOLVENT DMSO  
NS 50  
DS 4

SWH 24038.461 Hz  
FIDRES 0.366798 Hz  
AQ 1.3631488 sec  
RG 203  
DW 20.800 usec  
DE 6.50 usec  
TE 300.0 K  
D1 2.00000000 sec  
D11 0.03000000 sec  
TD0 1

===== CHANNEL f1 =====  
SFO1 100.6228293 MHz  
NUC1 13C  
P1 10.00 usec  
PLW1 54.50000000 W

===== CHANNEL f2 =====  
SFO2 400.1316005 MHz  
NUC2 1H  
CQPCPRG12 waltz16  
PCPD2 90.00 usec  
PLM2 11.89999962 W  
PLM12 0.33056000 W  
PLM13 0.267774999 W

F2 - Processing parameters  
SI 32768  
SF 100.6127685 MHz  
WDW EM  
SSB 0  
LB 3.00 Hz  
GB 0  
PC 1.40
